# Supplementary material for: Use of patient-reported outcome measures (PROMs) in clinical diabetes consultations: study protocol for the DiaPROM randomised controlled trial pilot study
Source: PubMed Central journal article supplement — BMJ Open. 2019 Jan 17;9(1):e024008. doi: 10.1136/bmjopen-2018-024008 (PMC6340474; doi:10.1136/bmjopen-2018-024008), 2019-01-17
Supplement: bmjopen-2018-024008.draft_revisions.pdf [file bmjopen-2018-024008.draft_revisions.pdf]

# BMJ Open

BMJ Open is committed to open peer review. As part of this commitment we make the peer review history of every article we publish publicly available.

When an article is published we post the peer reviewers' comments and the authors' responses online. We also post the versions of the paper that were used during peer review. These are the versions that the peer review comments apply to.

The versions of the paper that follow are the versions that were submitted during the peer review process. They are not the versions of record or the final published versions. They should not be cited or distributed as the published version of this manuscript.

BMJ Open is an open access journal and the full, final, typeset and author-corrected version of record of the manuscript is available on our site with no access controls, subscription charges or pay-per-view fees (<http://bmjopen.bmj.com>).

If you have any questions on BMJ Open's open peer review process please email [info.bmjopen@bmj.com](mailto:info.bmjopen@bmj.com)

# BMJ Open

## The use of Patient-Reported Outcome Measures (PROMs) in clinical diabetes consultations: study protocol for the DiaPROM randomized controlled trial.

|                               |                                                                                                                                                                                                                                                                                                                                                                                                                                                                                                                                                                                                                                                                           |
|-------------------------------|---------------------------------------------------------------------------------------------------------------------------------------------------------------------------------------------------------------------------------------------------------------------------------------------------------------------------------------------------------------------------------------------------------------------------------------------------------------------------------------------------------------------------------------------------------------------------------------------------------------------------------------------------------------------------|
| Journal:                      | <i>BMJ Open</i>                                                                                                                                                                                                                                                                                                                                                                                                                                                                                                                                                                                                                                                           |
| Manuscript ID                 | bmjopen-2018-024008                                                                                                                                                                                                                                                                                                                                                                                                                                                                                                                                                                                                                                                       |
| Article Type:                 | Protocol                                                                                                                                                                                                                                                                                                                                                                                                                                                                                                                                                                                                                                                                  |
| Date Submitted by the Author: | 24-May-2018                                                                                                                                                                                                                                                                                                                                                                                                                                                                                                                                                                                                                                                               |
| Complete List of Authors:     | Haugstvedt, Anne; Hogskulen pa Vestlandet, Department of Health and Caring Sciences<br>Hernar, Ingvild; Hogskulen pa Vestlandet, Department of Health and Caring Sciences; Univeristy of Bergen, Department of Global Public Health and Primary Care<br>Strandberg, Ragnhild ; Hogskulen pa Vestlandet, Department of Health and Caring Sciences<br>Richards, David; University of Exeter, Medical School<br>Nilsen, Roy; Hogskulen pa Vestlandet, Department of Health and Caring Sciences<br>Tell, Grethe; University of Bergen, Department of Global Public Health and Primary Care<br>Graue, Marit; Hogskulen pa Vestlandet, Department of Health and Caring Sciences |
| Keywords:                     | General diabetes < DIABETES & ENDOCRINOLOGY, Quality in health care < HEALTH SERVICES ADMINISTRATION & MANAGEMENT, Protocols & guidelines < HEALTH SERVICES ADMINISTRATION & MANAGEMENT                                                                                                                                                                                                                                                                                                                                                                                                                                                                                   |
|                               |                                                                                                                                                                                                                                                                                                                                                                                                                                                                                                                                                                                                                                                                           |

SCHOLARONE™  
Manuscripts

1  
2  
3  
4 The use of Patient-Reported Outcome Measures (PROMs) in  
5  
6  
7 clinical diabetes consultations: study protocol for the  
8  
9  
10 DiaPROM randomized controlled trial  
11  
12

13 Anne Haugstvedt,<sup>1</sup> Ingvild Hernar,<sup>1,2,3</sup> Ragnhild B Strandberg,<sup>1</sup> David Richards,<sup>4</sup>

14 Roy M Nilsen,<sup>1</sup> Grethe S Tell,<sup>2</sup> Marit Graue<sup>1</sup>  
15  
16  
17  
18

19 <sup>1</sup>Department of Health and Caring Sciences, Western Norway University of Applied Sciences,  
20 Bergen, Norway  
21  
22

23 <sup>2</sup>Department of Global Public Health and Primary Care, University of Bergen, Bergen,  
24 Norway  
25  
26  
27

28 <sup>3</sup>Department of Medicine, Haukeland University Hospital, Bergen, Norway  
29  
30

31 <sup>4</sup>Institute for Health Research, University of Exeter Medical School, Exeter, UK  
32  
33

34 Correspondence to: Anne Haugstvedt, Department of Health and Caring Sciences, Western  
35 Norway University of Applied Sciences, Post Box 7030, N-5020 Bergen, Norway. Tel: +47  
36 55 58 78 88; Mobile +47 47 82 92 20. E-mail: [ahau@hvl.no](mailto:ahau@hvl.no)  
37  
38  
39

40 Word count in Abstract: 269  
41  
42

43 Word count in main text: 3997  
44  
45  
46  
47  
48  
49  
50  
51  
52  
53  
54  
55  
56  
57  
58  
59  
60

## ABSTRACT

**Introduction** Although diabetes distress is found to be associated with decreased glycaemic control among adults with type 1 diabetes, the psychological and emotional impact of living with the disease is often not recognized and often underreported in diabetes care. Therefore, regular assessment of diabetes distress is recommended. Assessment of diabetes distress using Patient-Reported Outcome Measures (PROMs) in clinical practice has the potential to enhance care for people with diabetes by identifying problems and improving patient-clinician communication. In this study, we aim to develop, test and evaluate the effectiveness of an empowerment-based intervention using PROMs regarding diabetes distress as dialogue support in clinical diabetes consultations among adults with type 1 diabetes.

**Methods and analysis** As part of the implementation of PROMs in the Norwegian Diabetes Register for Adults, we will utilize PROMs data to improve the quality of clinical diabetes consultations. The study is a randomized controlled trial among adults with type 1 diabetes. We used the Medical Research Council's framework as a guide when developing the study and this protocol describes three of the four phases in this framework: (1) the development phase, (2) the feasibility and piloting phase, and (3) the evaluation phase. Both quantitative and qualitative approaches will be used in the various study phases. In the evaluation phase, the effect of the study intervention will be analysed with linear regression and mixed models.

**Ethics and dissemination** Ethical approval has been obtained from the Western Norway Regional Committee for Medical and Health Research Ethics for the feasibility study (2016/2200/REC west) and the pilot and randomized controlled trial evaluation study (2017/1506/REC west). Trial registration number ClinicalTrials.gov ID: NCT03471104

**Keywords** Type 1 diabetes, Diabetes distress, Patient-Reported Outcome Measures (PROMs), Complex intervention

## Strengths and limitations of the study

- This is a comprehensive study with the potential to provide new knowledge about the use of Patient-Reported Outcome Measures (PROMs) as dialogue support in clinical diabetes consultations to reduce diabetes distress among patients with type 1 diabetes.
- The use of the Medical Research Council's framework as a guide for the development and evaluation of this randomized controlled trial is a strength because appropriate methodological and practical choices can be made in all phases of the study.
- A key challenge includes possible contamination of the control group although the completed PROMs will not be available in the medical records of the participants in the control group.

## INTRODUCTION

The management of type 1 diabetes (T1D) is complex and people living with the condition need to make numerous daily choices related to their medical treatment.[1, 2] They need to monitor their blood glucose and administer insulin several times each day. The burden of living with T1D remains a challenge despite new insulin types and advances in insulin delivery and glucose monitoring technologies.[3] Many Norwegian adults with T1D do not achieve the recommended treatment goals for glycaemic control.[4, 5] This poor goal attainment might be due to inappropriate choice of insulin regimen for the individual, but research has also shown psychological and emotional aspects are important barriers to satisfactory diabetes self-management.[6]

The psychological and emotional impact of living with diabetes is often unrecognized and/or underreported in diabetes care.[7, 8] Diabetes distress, which reflects the emotional response to the burden, worries, anxieties, frustrations and stressors associated with managing diabetes in everyday life,[9, 10] is found to be associated with decreased glycaemic control.[11, 12] Therefore, the International Diabetes Federation recommends regular assessment of diabetes distress.[13] Such assessment is considered feasible and beneficial to promote the recognition of psychological and emotional issues that affect diabetes self-management.[9, 14]

Patient-Reported Outcome Measures (PROMs) involves asking people to complete questionnaires concerning the impact of their condition and its treatment on their health.[15] The integration of PROMs in clinical practice has the potential to improve care for people with diabetes and other chronic diseases by screening for and identifying problems, monitoring progress over time, improving patient-clinician communication and enabling

1  
2  
3 patients to become more involved in managing their own health.[16] The present study is part  
4  
5 of the implementation of PROMs in the Norwegian Diabetes Register for Adults (NDR-A).  
6  
7

## 8 **Aim**

9

10  
11 The overarching aim of the Diabetes Patient-Reported Outcome Measures  
12 (DiaPROM) trial is to develop, test and evaluate the effectiveness of a structured  
13  
14 empowerment-based intervention using PROMs regarding diabetes distress as dialogue  
15  
16 support in clinical diabetes consultations among adults with T1D. The primary hypothesis is  
17  
18 that the intervention will reduce diabetes distress. A secondary hypothesis is that the  
19  
20 intervention will improve overall well-being, perceived competence for diabetes management,  
21  
22 glycaemic control, and satisfaction with diabetes follow-up.  
23  
24  
25  
26  
27

## 28 **METHODS AND ANALYSIS**

29

### 30 **Study design and study overview**

31

32  
33 The study is designed as a multidisciplinary randomized controlled intervention trial  
34  
35 (RCT) and will consist of several interacting components and a number of behaviours  
36  
37 required by those receiving and delivering the intervention. Therefore, we used the Medical  
38  
39 Research Council's framework (MRC framework) as a guide when developing the study.[17,  
40  
41 18] The framework describes four important phases in the development, evaluation and  
42  
43 implementation of a new intervention initiative: (1) the development phase, (2) the feasibility  
44  
45 and piloting phase, (3) the evaluation phase and (4) the implementation phase (figure 1). In  
46  
47 this protocol, we will present the study gradually according to the first three phases. The first  
48  
49 two phases are the preparatory phases and phase 3 comprises the full-powered RCT. An  
50  
51 overview of the phases is presented in Table 1.  
52  
53  
54  
55  
56  
57  
58  
59  
60

**Table 1.** Overview of the study phases in the DiaPROM trial

| Phase                                | Aims                                                                                                                                                                                                  | Methods                                                                                                                                                                  | Participants                                                                                                                                                   |
|--------------------------------------|-------------------------------------------------------------------------------------------------------------------------------------------------------------------------------------------------------|--------------------------------------------------------------------------------------------------------------------------------------------------------------------------|----------------------------------------------------------------------------------------------------------------------------------------------------------------|
| Phase 1:<br>Development              | To perform a literature review and meet with health service users to identify relevant PROMs, develop a method for answering PROMs and develop an intervention following PROM scores of concern       | Systematic literature searches related to the use of PROMs in interventions, and consultations with several health service users, both individual and in groups          | 3 persons with type 1 diabetes (individually), and 3 persons with diabetes (in a group)                                                                        |
| Phase 2:<br>Feasibility and piloting |                                                                                                                                                                                                       |                                                                                                                                                                          |                                                                                                                                                                |
| 2a: Feasibility study                | To feasibility test the technical and practical procedures for collecting PROMs on a touch screen computer, and evaluate the participants' perceived understanding, relevance and number of questions | Qualitative approach (field notes), and quantitative approach (analyse questionnaire data on perceived understanding, relevance and number of questions)                 | At least 60 patients with type 1 diabetes $\geq 40$ years                                                                                                      |
| 2b: Pilot study                      | To test all the components of the upcoming full-powered RCT                                                                                                                                           | RCT design with outcome measures at baseline and after 1 year. Audiotaping of nurse consultations and qualitative interviews with participants and health care personnel | 80 (40 + 40) patients with type 1 diabetes (18–40 years), 6–8 nurse consultations, 15–20 participants and 8–10 physicians and nurses                           |
| Phase 3:<br>Evaluation               | To evaluate the effectiveness of a structured empowerment-based intervention with the use of PROMs as dialogue support in clinical diabetes consultations                                             | RCT design with outcome measures at baseline, after 1 year and after 2 years. A qualitative approach will be considered based on experiences from the pilot study        | A power analysis indicated a need for 77 participants (included 20% dropouts) in each group, but the pilot study will inform the final sample size calculation |

We used the SPIRIT checklist (<http://www.spirit-statement.org/wp-content/uploads/2013/01/SPIRIT-Checklist-download-8Jan13.pdf>) to make sure that all important and recommended items are addressed in the study protocol.

### Phase 1: development of the study

The initial development of the DiaPROM trial took place during 2016 and 2017. The essential tasks in the development phase were to determine (1) which PROMs to include, (2) how patients should complete the PROMs, and (3) which intervention should follow PROMs scores of special concern.



### *Literature review*

We performed systematic literature searches to identify published articles on the use of PROMs in clinical diabetes intervention studies. Regarding the use of PROMs in clinical practice, we identified a multi-centre study across eight countries that had tested the feasibility and impact of a procedure for implementing PROMs in routine diabetes care.[14,19] This computer-assisted “Monitoring of Individual Needs in Diabetes” procedure aimed to improve recognition and management of the psychological needs of patients with diabetes in routine care. Regular assessment of psychological needs was implemented as part of the annual review in diabetes clinics. The assessment included diabetes distress measured by the Problem Areas in Diabetes (PAID) scale. Several other studies have reported PAID as an appropriate instrument for use in clinical diabetes consultations. This instrument may contribute to improved communication by making the dialogue between health care providers and patients more therapeutic and goal oriented.[20-25] The PAID scale has been translated into several languages, including Norwegian.[26]

### *Patient and public involvement*

A crucial question when considering which PROMs to include was what adult people with T1D perceived as the most important and relevant aspects to emphasize in diabetes follow-up. Thus, we consulted several groups of health service users. The health service users indicated that the 20 statements in PAID were relevant to a life with diabetes. In addition, they experienced the burden of completing PAID and the study’s evaluation measures as acceptable for the participants. To include the voice of the health service users throughout the study, two people with diabetes are included in the project group. They will contribute in all phases of the study. Furthermore, we will invite additional people with diabetes to share their views on the various phases of the study. Involving health service users at different levels

1  
2  
3 (from consultation to contribution) is important to provide insight into patients' perspectives  
4  
5 and useful in terms of shaping the research processes.[27]  
6  
7

### 8 *Intervention PROMs*

9

10 Based on the literature review and input from the health service users, we chose the  
11 PAID scale as the tool for dialogue support in the study intervention. The scale was developed  
12 to gain insight into the breadth of emotional responses to living with diabetes and consists of  
13 20 statements regarding diabetes distress (e.g. "feeling constantly concerned about food and  
14 eating", "worrying about low blood sugar reactions").[28-30] The scores are on a 5-point  
15 Likert scale from 0 (not a problem) to 4 (serious problem). An item score of 3 (somewhat  
16 serious problem) or 4 (serious problem) indicates moderate to serious diabetes distress related  
17 to the specific item. Scale scores are transformed to a 0-100 scale, with higher scores  
18 indicating greater distress.  
19  
20  
21  
22  
23  
24  
25  
26  
27  
28  
29

### 30 *Completing PROMs*

31

32 The literature describes various methods for administration of PROMs such as paper-  
33 based self-administration at home or in the clinic, interviews by telephone or personal  
34 meetings, computer-assisted self-administration in the clinic or mail- or web-based  
35 administration from patients' homes.[16] In our study, we decided on computer-assisted  
36 administration on a touch screen computer in the outpatient clinic. Using this method has  
37 advantages, such as efficient and simultaneous data entry and minor privacy challenges.  
38  
39  
40  
41  
42  
43  
44  
45  
46

### 47 *The study intervention*

48

49 Based on the literature review and input from the health service users, we developed  
50 the study intervention that we aim to evaluate in phase 3. The starting point for the  
51 intervention is when participants complete the PAID scale and physicians download the  
52 scores into the participants' medical record as part of the annual consultation (figure 2).  
53  
54  
55  
56  
57  
58  
59  
60

1  
2  
3 Further, physicians will review and discuss the PAID scores briefly with participants.  
4  
5 Participants with one or more single PAID item(s) score of 3 or 4 (somewhat serious or  
6  
7 serious problem), or PAID total score  $\geq 30$ , will be referred to additional diabetes nurse  
8  
9 consultations. Participants with lower scores will receive regular follow-up according to usual  
10  
11 clinical protocols.  
12

13  
14 The nurse follow-up for those with PAID scores of concern will consist of at least two  
15  
16 consultations. The first will take place within 4 weeks after the annual consultation and  
17  
18 inclusion in the trial, and the second within 3 months after the first. After the second nurse  
19  
20 consultation, the nurse and the participant will agree on any further follow-up until the next  
21  
22 annual consultation with the physician. The diabetes nurses' review of PAID scores in  
23  
24 conversation with participants will follow a communication manual based on key elements  
25  
26 from empowerment theory and self-determination theory, such as empathetic communication  
27  
28 and autonomy support.[31-33] The communication skills highlighted in the manual involve  
29  
30 "active listening", "asking open questions", "responding", "summing up" and "agreeing on  
31  
32 goals and actions to take". For further work with the participants problem areas, goals and  
33  
34 actions to take will be written on a separate form. Finally, 12 months after inclusion, the  
35  
36 participants will complete the PAID again before the annual consultation with the physician.  
37  
38  
39

#### 40 41 *Evaluation measures* 42

43 The measurements used to measure the effect of the evaluation study (phase 3) were  
44  
45 also chosen on the basis of the literature review and considerations in the development phase.  
46  
47 Diabetes distress, measured by the Diabetes Distress Scale (DDS), has been chosen as the  
48  
49 primary outcome in the study. The DDS contains 17 items and 4 subscales: emotional burden  
50  
51 (5 items), physician-related distress (4 items), regimen distress (5 items) and diabetes-related  
52  
53 interpersonal distress (3 items).[34] The scores are on a 6-point Likert scale from 1 (not a  
54  
55  
56  
57  
58  
59

1  
2  
3 problem) to 6 (serious problem) with a mean total or subscale score from 1 to 6.[35] As  
4  
5 secondary outcomes, the World Health Organization's 5-item well-being index (WHO-5)[36-  
6  
7 38] and the Perceived Competence for Diabetes Scale (PCDS)[39-41] are included for  
8  
9 evaluation of overall well-being and perceived diabetes competence, respectively.  
10  
11

12 The participants will complete both the PAID and the evaluation PROMs before the  
13  
14 annual consultation, and some standard questions about satisfaction with follow-up in health  
15  
16 care will be completed after the same consultation.  
17  
18

## 19 20 **Phase 2a: feasibility study**

21  
22 A feasibility study started in 2017 with the aims of (1) examining the technical and  
23  
24 practical feasibility of collecting PROMs on a touch screen computer in the outpatient clinic,  
25  
26 and (2) evaluating the participants' perceived understanding, the number and relevance of  
27  
28 items, and the acceptability of completing PROMs annually. The participants in the feasibility  
29  
30 study were adults with T1D aged  $\geq 40$  years from Haukeland University Hospital in western  
31  
32 Norway.  
33  
34

### 35 36 *Data collection and outcomes*

37  
38 The data collection has been completed. Regarding the first aim, field observations  
39  
40 provided data on the technical and practical procedures related to the completion of PROMs  
41  
42 on the touch screen computer. Informal conversations with participants and health care  
43  
44 personnel about their experiences also took place. Regarding perceived understanding,  
45  
46 relevance and number of items, and acceptability of completing PROMs annually, we  
47  
48 included a paper-based questionnaire with questions adapted for this study.  
49  
50  
51  
52  
53  
54  
55  
56  
57  
58  
59  
60

### *Data analysis*

The data analysis is ongoing and will be completed in 2018. The field notes from the observations and informal conversations will be grouped by themes explaining the main content of the notes. The perceived understanding, the number and relevance of items and acceptability have been analysed descriptively. As additional analyses, we have estimated the proportion of participants meeting the inclusion criteria, the proportion of eligible patients showing up at the clinic and the proportion completing the PROMs. These estimates will give important information on recruitment of participants for the upcoming pilot and evaluation study.

### *Preliminary results*

Almost 20% of 137 invited patients did not show up at the clinic (change of appointments, sick, no reason given). Further, most of the invited participants did not go directly to the computer on arrival at the clinic as instructed on the information sheet. Thus, we need to develop clearer information and procedures for the pilot study to avoid loss of potential participants among those invited. Sixty-nine individuals participated in the study and 83% of them reported that, to a high or a very high degree, they would be positive about an annual completion of PROMs. Further analyses of the results from the feasibility study are ongoing, and we plan to publish these in a separate article.

### **Phase 2b: pilot study**

A pilot study will be conducted to test the feasibility of all the components of the forthcoming full-powered RCT; thus, the pilot will be designed as a randomized controlled trial in the same way as the evaluation study (phase 3). The aims of the pilot study are to:

1. evaluate the recruitment and the number of dropouts during the intervention;
2. evaluate the performance of the randomization procedure;

- 1
- 2
- 3 3. evaluate if the PAID scores qualifying for referral to nurse consultations seem suitable;
- 4
- 5 4. evaluate the variance in participants' outcome measurements and the estimated between-
- 6
- 7 group differences and their 95% confidence intervals (CI);
- 8
- 9 5. evaluate if the intervention consultations are suitable and conducted in accordance with the
- 10
- 11 given procedure; and
- 12
- 13 6. explore the patients' and health care personnel's experiences with the use of PAID as
- 14
- 15 dialogue support in clinical diabetes consultations.
- 16
- 17

### 18 *Participants*

19  
20  
21  
22 In accordance with recommendations for pilot RCTs of interventions,[42] we will  
23  
24 include 80 participants: 40 in the intervention group and 40 in the control group. The  
25  
26 participants should have T1D for at least 1 year and aged  $\geq 18$  to  $< 40$  years. The same  
27  
28 inclusion and exclusion criteria as described for the evaluation study will be applied. At  
29  
30 inclusion, we will test the computer-based randomization procedure described for the  
31  
32 evaluation study. The participants allocated to the intervention group will receive the  
33  
34 described intervention with all its components. Thus, the pilot study will last for a year.  
35  
36  
37

### 38 *Data collection and outcomes*

39  
40 All participants (both intervention and control groups) will complete the study  
41  
42 PROMs (before the annual consultation) and a paper-based questionnaire about their  
43  
44 experience and satisfaction with the diabetes follow-up (after the consultation) at baseline and  
45  
46 after 12 months (at the end of the intervention). Regarding data entry of these data, range  
47  
48 checks for data values will be performed. We will document all types of contacts between the  
49  
50 participants and the diabetes outpatient clinic for all participants throughout the study period.  
51  
52 The outcome measures will be identical to the outcome measures described for the evaluation  
53  
54 study.  
55  
56  
57  
58  
59  
60

1  
2  
3 To test if the extra consultations by diabetes nurses are carried out in accordance with  
4 the procedure described for the intervention, a random selection of consultations (6–8) will be  
5 audiotaped. For this audiotaping, we will obtain additional consent from the patients and from  
6 the nurses. Qualitative in-depth interviews with 15–20 participants and 8–10 health care  
7 personnel (physicians and nurses) will be conducted after the intervention regarding their  
8 experiences with the intervention and the use of PAID as dialogue support in clinical  
9 consultations.  
10  
11  
12  
13  
14  
15  
16  
17  
18

### 19 *Data analysis*

20  
21  
22 In accordance with the aims of the pilot study, the recruitment of participants, the  
23 number of dropouts during the intervention, the performance of the randomization procedure,  
24 and the participants' PAID scores will be analysed descriptively. To evaluate the variance in  
25 the outcome measures and the estimated between-group differences, we will estimate the  
26 mean, SD and CI of the DDS and the other evaluation measurements before and after the  
27 intervention period for both the intervention and control groups. To evaluate whether the  
28 intervention consultations were suitable and conducted in accordance with the given  
29 procedures, we will transcribe the audiotaped consultations and analyse them using thematic  
30 analysis.[43] The interviews to evaluate the patients' and health care personnel's experiences  
31 with the use of PAID in the clinical consultations will also be transcribed and analysed with  
32 thematic analysis.  
33  
34  
35  
36  
37  
38  
39  
40  
41  
42  
43  
44  
45  
46

### 47 **Phase 3: the evaluation study (the RCT)**

48  
49 The primary aim of the full-powered study is to evaluate the effectiveness of the  
50 structured empowerment-based intervention with the use of PROMs as dialogue support in  
51 clinical diabetes consultations in accordance with the overarching aim of the DiaPROM trial.  
52  
53  
54  
55  
56  
57  
58  
59  
60

1  
2  
3 Our procedures may be modified on the basis of data collected from the feasibility and pilot  
4  
5 studies.

### 6 7 8 *Participants and eligibility criteria*

9  
10  
11 As in the pilot study, participants will be adults with T1D for at least 1 year aged from  
12  
13  $\geq 18$  to  $< 40$  years recruited from two university hospitals in western Norway. Pregnant  
14  
15 women, patients with severe somatic or psychiatric co-morbidities and people unable to read  
16  
17 and complete questionnaires on the computer because of language, reading, or cognitive  
18  
19 problems will be excluded. Eligible participants will receive information and consent forms  
20  
21 by regular mail before the annual diabetes consultation at the clinic. The information form  
22  
23 include information about volunteerism and the possibility to withdraw from the study at any  
24  
25 time point without consequences.  
26  
27

### 28 29 *Sample size calculations*

30  
31  
32 Preliminary power calculations have been performed based on a power of 80% and a  
33  
34 significance level of 5% to detect the minimal clinically important difference (MCID) in DDS  
35  
36 scores between the intervention group and the control group after the intervention. The MCID  
37  
38 is set to 0.4 for DDS scores from 1 to 6. A review of health-related quality of life instruments  
39  
40 by Normann *et al.*[44] found that the MCID estimates often appear to be half an SD. Previous  
41  
42 Norwegian data from Strandberg *et al.*[11] indicated a mean score (SD) of 2.0 (0.8) for the  
43  
44 DDS, yielding half SD of approximately 0.4. This is consistent with Fisher *et al.*[35] who  
45  
46 indicated 0.4 as a clinically meaningful difference in DDS, which was also half SD in that  
47  
48 study. The power calculations based on these data indicate that 64 participants in each group  
49  
50 will be sufficient to detect a treatment difference after the intervention. To account for  
51  
52 dropout (20%), we will include at least 77 participants in each group. However, we will  
53  
54  
55  
56  
57  
58  
59  
60



1  
2  
3 update the power calculations after the pilot study has been conducted to take post-  
4  
5 intervention between-group estimates (means and SDs) into account.  
6  
7

#### 8 *Randomization procedure and allocation concealment*

9

10 We will use computer-generated block randomization at the patient level to ensure  
11  
12 equal numbers of participants in the intervention and control groups. Further, we will stratify  
13  
14 for gender to secure equal numbers of men and women in each group. When participants  
15  
16 complete the PROMs on the touch screen computer, they will receive an individual four-  
17  
18 character code. When the physician downloads the PROMs data using the code, a concealed  
19  
20 computerized allocation will take place. Information about which group the person is  
21  
22 allocated will appear on the computer screen and the physician will inform the participant  
23  
24 immediately. Thus, neither the participants nor the health care providers can be blinded.  
25  
26  
27

#### 28 *The intervention*

29  
30

31 Participants allocated to the intervention group will receive the intervention described  
32  
33 in the development section (p. 8). The intervention will last for a year; from one annual  
34  
35 consultation to the next. For most patients the annual consultations normally constitute “care  
36  
37 as usual”. All participants will receive their usual care. The intervention will constitute an  
38  
39 additional care.  
40  
41  
42

#### 43 *The control group*

44  
45

46 The control group will receive “care as usual” which does not include a structured  
47  
48 focus on psychological and emotional diabetes distress. All participants complete the PROMs  
49  
50 scores before an annual consultation. The randomization take place afterwards. However, for  
51  
52 the participants allocated to the control group, the scores will not be accessible in the  
53  
54 electronic patient records until the study is completed.  
55  
56  
57  
58  
59  
60

### *Data collection and outcomes*

Participants will complete the primary and secondary outcome measures at baseline, at 12 months (after the intervention) and at 24 months follow-up. For subgroup analyses, we will perform a computerized retrieval of the following variables from the participants' electronic patient records: sex, age, ethnicity, body mass index, diabetes duration, HbA<sub>1c</sub>, insulin regimen, insulin doses, severe hypoglycaemic episodes needing assistance in the past year, hospitalizations, co-morbidities and diabetes late complications.

### *Data analysis*

To assess both short- and long-term effects of the intervention, we will collect one pre-intervention measure and two post-intervention (after 1 and 2 years) measures for both the intervention and control group. All analyses will be on an intention-to-treat basis, and we will compare intervention and control groups for each follow-up time using linear mixed effects models with DDS as the primary outcome measure. All models will define intervention, time and intervention-by-time interaction as fixed effects (all categorical), whereas a random intercept will be specified to account for correlated observations of the same individual (an exchangeable correlation structure assumed). To obtain  $p$  values or 95% CI for difference in DDS means between the comparison groups at different time points, we will perform a post-hoc test for pairwise comparison accounting for multiple testing. To test whether the predicted DDS means change differently over time, we will use the likelihood ratio test by comparing the log-likelihood between models with and without the intervention-by-time interaction. In linear mixed effects models, all available DDS measures for an individual will be used for estimation even though certain measures may be missing on follow-up for that individual. The model will produce unbiased estimates provided the data are missing at random. As this is a

1  
2  
3 block-randomized trial, we will assume that the comparison groups are similar in all aspects  
4  
5 except the treatment.  
6

### 7 8 *Qualitative approach* 9

10  
11 In addition to the quantitative evaluation of the study effect, we will explore the  
12  
13 patients' and health care personnel's experiences of the intervention's effectiveness and  
14  
15 appropriateness. However, data and analyses from the qualitative approaches in the pilot  
16  
17 study will be considered before deciding on the final strategy and procedures for the  
18  
19 qualitative approach in the evaluation study.  
20  
21

## 22 23 **ETHICS AND DISSEMINATION** 24 25

26  
27 The Norwegian Regional Committee for Medical and Health Research Ethics has  
28  
29 approved the feasibility study (2016/2200/REK west) and the pilot and evaluation study  
30  
31 (2017/1506/REK west). Haukeland University Hospital, Bergen, Norway is the responsible  
32  
33 research institution (trial sponsor) where the study data will be stored on a secure research  
34  
35 server. In order to protect confidentiality, names of the potential and enrolled participants will  
36  
37 be stored separate from the other study data. Only the principle investigator and a few  
38  
39 members of the project group have access to the study data. If important protocol  
40  
41 modifications happen, this will be communicated to the ethic committee and  
42  
43 ClinicalTrials.gov. Further information and contact data can be obtained from  
44  
45 ClinicalTrials.gov, registration number NCT03471104.  
46  
47  
48

49  
50 Completing the PROMs may activate latent psychological or psychosocial problems  
51  
52 and negative feelings. To care for any participants in the control group reporting worryingly  
53  
54 high levels of distress, the research team will continuously review the reported distress levels  
55  
56  
57  
58  
59  
60

1  
2  
3 and discuss with the physicians the possible need for more intensive care or referral to  
4  
5 psychological or psychiatric follow-up for those reporting worryingly levels of distress.  
6  
7

8 We will present the findings of the study phases at national and international  
9  
10 conferences and submit manuscripts to peer-reviewed journals and popular science journals.  
11  
12 We will also publish the findings in popular science journals, public newspapers and journals  
13  
14 for relevant user groups.  
15

## 16 17 **DISCUSSION** 18

19  
20  
21 In this multi-phase study, we have used relevant literature and input from health  
22  
23 service users in selecting PAID to focus on diabetes distress as a component of the  
24  
25 intervention. Schmitt *et al.*[25] emphasize the necessity of a justified choice of measurement  
26  
27 and recommend the use of the PAID when the clinical or scientific purpose is to assess a  
28  
29 variety of emotional concerns related to living with diabetes. Carlsen *et al.*[45] found that the  
30  
31 use of PAID could benefit patients but emphasized the need for follow-up studies to evaluate  
32  
33 whether the PAID should be implemented in routine diabetes care.  
34  
35

36  
37  
38 The choice of PAID as the intervention tool and the DDS as the primary evaluation  
39  
40 tool is in accordance with previous research. Both instruments have previously shown  
41  
42 satisfactory psychometric properties to map individual levels of diabetes distress, but it has  
43  
44 been claimed that the PAID has some advantages for use in clinical practice and the DDS  
45  
46 might have some advantages for use in clinical trials, because it also contributes to identifying  
47  
48 sub-domains of distress.[11, 25]  
49  
50  
51  
52  
53  
54  
55  
56  
57  
58  
59  
60

## Strengths and limitations

The use of the MRC framework is a strength in the development of this study, because it includes several complex and interacting components that need to be considered and tested before conducting a full-scale randomized controlled trial.

We have included primarily disease-specific evaluation measures, but also one generic PROM (WHO-5). Disease-specific PROMs are used to capture information that is most pertinent to particular patient groups, but they might miss domains affecting the patient that are unrelated to their disease.[16, 46] Generic instruments may capture broad dimensions of health and allow for comparisons between populations but might not be sensitive to changes in disease-specific health domains over time or in relation to interventions.[15]

The fact that the control group in the study will also complete the PAID and the evaluation PROMs before the annual diabetes consultation, and that the same physicians meet participants from both the intervention and the control groups might lead to intervention contamination challenges. This might be a challenge although the scores will not be accessible in the electronic patient records of participants in the control group. The pilot study will provide important information about the extent of this challenge and will be considered before the sample size calculation for the evaluation study.

## Acknowledgements

Thanks to the Norwegian Nurses Association, the Norwegian Diabetes Association and Western Norway University of Applied Sciences for funding the study. Thanks also to the Norwegian Diabetes Register for Adults and DIPS AS for fruitful collaboration. Further, we thank all the health care personnel and the health care service user representatives involved in the study. Thanks also to senior research fellow Peter Craig for giving us the permission to

1  
2  
3 reproduce the figure describing the study phases in the development and implementation of a  
4  
5 complex intervention.  
6  
7

## 8 **Contributors**

9  
10  
11 AH, IH, RBS, RMN, GST, DR and MG contributed to the design of the study. AH  
12  
13 drafted the manuscript for the study protocol. All authors contributed to editing the final  
14  
15 manuscript.  
16  
17

## 18 **Funding**

19  
20  
21  
22  
23 The study is funded by the Norwegian Nurse Association, Western Norway University  
24  
25 of Applied Sciences, the Norwegian Diabetes Association and the Norwegian Diabetes  
26  
27 Register for Adults. The first two funded a postdoctoral position and a PhD position,  
28  
29 respectively. The last two contributed with running funds.  
30  
31

## 32 **Competing interests**

33  
34  
35  
36 None declared.  
37  
38  
39

## 40 **Patient consent**

41  
42  
43  
44 Obtained.  
45  
46

## 47 **REFERENCES**

- 48  
49  
50  
51 1. American Association of Diabetes Educators (ADE). AADE7 Self-Care Behaviors.  
52  
53 *Diabetes Educ* 2008;34:445-9.  
54  
55  
56  
57  
58  
59

- 1  
2  
3 2. American Diabetes Association (ADA). Introduction: standards of medical care in  
4 diabetes. *Diabetes Care* 2018;41(Suppl 1):1-2. Available from:  
5  
6 <<https://doi.org/10.2337/dc18-Sint01>> (Accessed Jan 22, 2018).  
7  
8
- 9  
10 3. Jones A, Vallis M, Pouwer F. If it does not significantly change HbA 1c levels why  
11 should we waste time on it? A plea for the prioritization of psychological well-being in  
12 people with diabetes. *Diabet Med* 2015;32:155-63.  
13  
14
- 15  
16 4. Cooper JG, Claudi T, Thordarson HB, *et al.* Treatment of type 1 diabetes in the  
17 specialist health service-data from the Norwegian Diabetes Register for Adults. *J*  
18 *Norwegian Med Assoc* 2013;133:2257.  
19  
20
- 21  
22 5. Carlsen K, Haugstvedt A, Graue M. [PAID as screening and working tool in clinical  
23 consultations]. *Norwegian J Clin Nurs* 2015;10:228-37 [in Norwegian].  
24  
25
- 26  
27 6. Pouwer F, Nefs G, Nouwen A. Adverse effects of depression on glycemic control and  
28 health outcomes in people with diabetes: a review. *Endocrinol Metab Clin North Am*  
29 2013;42:529-44.  
30  
31
- 32  
33 7. Pouwer F, Beekman ATF, Lubach C, *et al.* Nurses' recognition and registration of  
34 depression, anxiety and diabetes-specific emotional problems in outpatients with  
35 diabetes mellitus. *Patient Educ Couns* 2006;60:235-40.  
36  
37
- 38  
39 8. Peyrot M, Rubin RR, Lauritzen T, *et al.* Psychosocial problems and barriers to  
40 improved diabetes management: results of the Cross-National Diabetes Attitudes,  
41 Wishes and Needs (DAWN) Study. *Diabet Med* 2005;22:1379-85.  
42  
43
- 44  
45 9. Fisher L, Gonzalez JS, Polonsky WH. The confusing tale of depression and distress in  
46 patients with diabetes: a call for greater clarity and precision. *Diabet Med*  
47 2014;31:764-72.  
48  
49  
50  
51  
52  
53  
54  
55  
56  
57  
58  
59  
60

10. Snoek FJ, Bremmer MA, Hermanns N. Constructs of depression and distress in diabetes: time for an appraisal. *Lancet Diabetes Endocrinol* 2015;3:450-60.
11. Strandberg RB, Graue M, Wentzel-Larsen T, *et al.* Longitudinal relationship between diabetes-specific emotional distress and follow-up HbA<sub>1c</sub> in adults with Type 1 diabetes mellitus. *Diabet Med* 2015;32:1304-10.
12. Fisher L, Hessler D, Polonsky W, *et al.* Diabetes distress in adults with type 1 diabetes: Prevalence, incidence and change over time. *J Diabetes Complications* 2016;30:1123-8.
13. International Diabetes Federation. *International Diabetes Federation Diabetes Atlas* [Online]. 8th ed. International Diabetes Federation; 2017. Available from: <http://www.diabetesatlas.org/resources/2017-atlas.html> (accessed Jan 15, 2018).
14. Snoek FJ, Kersch NY, Eldrup E, *et al.* Monitoring of Individual Needs in Diabetes (MIND)-2: follow-up data from the cross-national Diabetes Attitudes, Wishes, and Needs (DAWN) MIND study. *Diabetes Care* 2012;35:2128-32.
15. Greenhalgh J, Dalkin S, Gooding K, *et al.* Functionality and feedback: a realist synthesis of the collation, interpretation and utilisation of patient-reported outcome measures data to improve patient care. *Health Serv Deliv Res* 2017;5.2.
16. Snyder CF, Aaronson NK, Choucair AK, *et al.* Implementing patient-reported outcomes assessment in clinical practice: a review of the options and considerations. *Qual Life Res* 2012;21:1305-14.
17. Craig P, Dieppe P, Macintyre S, *et al.* Developing and evaluating complex interventions: the new Medical Research Council guidance. *BMJ* 2008;337:979-83.
18. Craig, P. Developing and evaluating complex interventions: reflections on the 2008 MRC guidance. *Int J Nurs Stud* 2013;50:585-92.



- 1  
2  
3 19. Snoek, FJ, Kersch NY, Eldrup E, *et al.* Monitoring of Individual Needs in Diabetes  
4 (MIND): baseline data from the cross-national Diabetes Attitudes, Wishes, and Needs  
5 (DAWN) MIND study. *Diabetes Care* 2011;34:601-3.  
6  
7  
8  
9  
10 20. Chawla A, Saha C, Marrero DG. A novel application of the problem areas in diabetes  
11 (PAID) instrument to improve glycemic control and patient satisfaction. *Diabetes*  
12 *Educ* 2010;36:337-44.  
13  
14  
15  
16 21. van Bastelaar KMP, Pouwer F, Geelhoed-Duijvestijn PHLM, *et al.* Diabetes-specific  
17 emotional distress mediates the association between depressive symptoms and  
18 glycemic control in type 1 and type 2 diabetes. *Diabet Med* 2010;27:798-803.  
19  
20  
21  
22  
23 22. Meeuwissen JAC, Hollemann GJM, de Jong FJ, *et al.* Screening and guided self-help  
24 intervention for anxiety and depression in patients with type 2 diabetes. A new role for  
25 diabetes nurses in primary care? *Eur Diabetes Nurs* 2011;8:47-52.  
26  
27  
28  
29  
30 23. Fleer J, Tovote KA, Keers JC, *et al.* Screening for depression and diabetes-related  
31 distress in a diabetes outpatient clinic. *Diabet Med* 2013;30:88-94.  
32  
33  
34  
35 24. Reddy J, Wilhelm K, Campell L. Putting PAID to diabetes-related distress: the  
36 potential utility of the problem areas in diabetes (PAID) scale in patients with diabetes.  
37 *Psychosomatics* 2013;54:44-51.  
38  
39  
40  
41  
42 25. Schmitt A, Reimer A, Kulzer B, *et al.* How to assess diabetes distress: comparison of  
43 the Problem Areas in Diabetes Scale (PAID) and the Diabetes Distress Scale (DDS).  
44 *Diabet Med* 2016;33:835-43.  
45  
46  
47  
48  
49 26. Graue M, Haugstvedt A, Wentzel-Larsen T, *et al.* Diabetes-related emotional distress  
50 in adults: reliability and validity of the Norwegian versions of the Problem Areas in  
51 Diabetes Scale (PAID) and the Diabetes Distress Scale (DDS). *Int J Nurs Stud*  
52 2011;49:174-182.  
53  
54  
55  
56  
57  
58  
59  
60

- 1
  - 2
  - 3
  - 4
  - 5
  - 6
  - 7
  - 8
  - 9
  - 10
  - 11
  - 12
  - 13
  - 14
  - 15
  - 16
  - 17
  - 18
  - 19
  - 20
  - 21
  - 22
  - 23
  - 24
  - 25
  - 26
  - 27
  - 28
  - 29
  - 30
  - 31
  - 32
  - 33
  - 34
  - 35
  - 36
  - 37
  - 38
  - 39
  - 40
  - 41
  - 42
  - 43
  - 44
  - 45
  - 46
  - 47
  - 48
  - 49
  - 50
  - 51
  - 52
  - 53
  - 54
  - 55
  - 56
  - 57
  - 58
  - 59
  - 60
27. Staley K. 'Is it worth doing?' Measuring the impact of patient and public involvement in research. *Res Involv Engagem* 2015; 1:6.
28. Polonsky WH, Anderson BJ, Lohrer PA, et al. Assessment of diabetes-related distress. *Diabetes Care* 1995;18:754-60.
29. Welch GW, Jacobson AM, Polonsky WH. The Problem Areas in Diabetes scale: an evaluation of its clinical utility. *Diabetes Care* 1997;20:760-6.
30. Welch G, Weinger K, Anderson B, et al. Responsiveness of the Problem Areas in Diabetes (PAID) questionnaire. *Diabet Med* 2003;20:69-72.
31. Anderson RM, Funnell M. *The Art of Empowerment: Stories and Strategies for Diabetes Educators*. Alexandria, Virginia: American Diabetes Association; 2000.
32. Deci EL, Ryan RM. *Handbook of Self-determination Research*. Rochester, NY: University of Rochester Press; 2002.
33. Zoffmann V, Hörnsten Å, Storbækken S, et al. Translating person-centered care into practice: a comparative analysis of motivational interviewing, illness-integration support, and guided self-determination. *Patient Educ Couns* 2016;99:400-7.
34. Polonsky WH, Fisher L, Psyd JE, et al. Assessing psychosocial distress in diabetes – development of the Diabetes Distress Scale. *Diabetes Care* 2005;28:626-31.
35. Fisher L, Hessler D, Glasgow RE, et al. REDEEM: a pragmatic trial to reduce diabetes distress. *Diabetes Care* 2013;36:2551-8.
36. de Wit M, Pouwer F, Gemke RJJ, et al. Validation of the WHO-5 Well-Being Index in adolescents with type 1 diabetes. *Diabetes Care* 2007;30:2003-6.

- 1  
2  
3 37. Hajos TR, Pouwer F, Skovlund SE, *et al.* Psychometric and screening properties of the  
4 WHO-5 well-being index in adult outpatients with Type 1 or Type 2 diabetes mellitus.  
5  
6 *Diabet Med* 2013;30:e63-9.  
7  
8  
9  
10 38. Topp CW, Østergaard SD, Søndergaard S, *et al.* The WHO-5 Well-Being Index: a  
11 systematic review of the literature. *Psychother Psychosom* 2015;84:167-76.  
12  
13  
14 39. Williams GC, McGregor HA, Zeldman A, *et al.* Testing a self-determination theory  
15 process model for promoting glycemic control through diabetes self-management.  
16  
17 *Health Psychol* 2004;23:58-66.  
18  
19  
20  
21 40. Williams GC, McGregor HA, King D, *et al.* Variation in perceived competence,  
22 glycemic control, and patient satisfaction: relationship to autonomy support from  
23 physicians. *Patient Educ Couns* 2005;57:39-45.  
24  
25  
26  
27  
28 41. Mohn J, Graue M, Assmus J, *et al.* Self-reported diabetes self-management  
29 competence and support from healthcare providers in achieving autonomy are  
30 negatively associated with diabetes distress in adults with type 1 diabetes. *Diabet Med*  
31  
32 2015;32:1513-19.  
33  
34  
35  
36  
37 42. Richards DA, Hallberg IR. Section 2. Investigating feasibility and undertaking pilot  
38 testing of complex interventions. *Complex Interventions in Health. An Overview of*  
39  
40 *Research Methods*. Routledge; 2015:121-82.  
41  
42  
43  
44 43. Braun V, Clark V. Using thematic analysis in psychology. *Qual Res Psychol*  
45  
46 2008;3:77-101.  
47  
48  
49 44. Norman GR, Sloan JA, Wyrwich KW. Interpretation of changes in health-related  
50 quality of life. The remarkable universality of half a standard deviation. *Med Care*  
51  
52 2003;41:582-92.  
53  
54  
55  
56  
57  
58  
59  
60

- 1  
2  
3 45. Carlsen K, Haugstvedt A, Graue M. [PAID as screening and working tool in clinical  
4 consultations]. *Norwegian J Clin Nurs* 2015;10:228-37 [in Norwegian].  
5  
6  
7  
8 46. Black N, Burke L, Forrest CB, *et al.* Patient-reported outcomes: pathways to better  
9 health, better services, and better societies. *Qual Life Res* 2016;25:1103-12.  
10  
11  
12  
13  
14  
15  
16  
17  
18  
19  
20  
21  
22  
23  
24  
25  
26  
27  
28  
29  
30  
31  
32  
33  
34  
35  
36  
37  
38  
39  
40  
41  
42  
43  
44  
45  
46  
47  
48  
49  
50  
51  
52  
53  
54  
55  
56  
57  
58  
59  
60

1  
2  
3 **Figure 1.** Key elements in the Medical Research Council's guidance for developing,  
4  
5 evaluating and implementing complex interventions (MRC framework). Reproduced  
6  
7 from Craig *et al.*[17] with permission.  
8  
9

10 **Figure 2.** The study intervention in the DiaPROM trial.  
11  
12  
13  
14  
15  
16  
17  
18  
19  
20  
21  
22  
23  
24  
25  
26  
27  
28  
29  
30  
31  
32  
33  
34  
35  
36  
37  
38  
39  
40  
41  
42  
43  
44  
45  
46  
47  
48  
49  
50  
51  
52  
53  
54  
55  
56  
57  
58  
59  
60

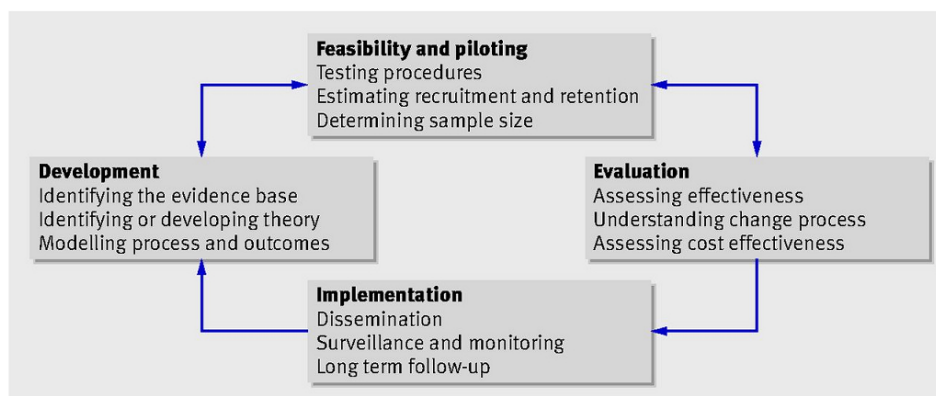

Figure 1

Figure 1

92x49mm (300 x 300 DPI)

1  
2  
3  
4  
5  
6  
7  
8  
9  
10  
11  
12  
13  
14  
15  
16  
17  
18  
19  
20  
21  
22  
23  
24  
25  
26  
27  
28  
29  
30  
31  
32  
33  
34  
35  
36  
37  
38  
39  
40  
41  
42  
43  
44  
45  
46  
47  
48  
49  
50  
51  
52  
53  
54  
55  
56  
57  
58  
59  
60

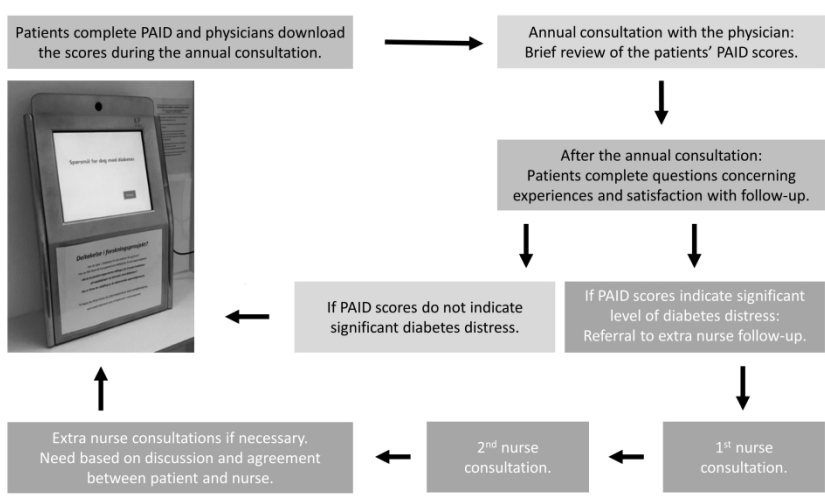

Figure 2 The intervention

Figure 2

338x190mm (300 x 300 DPI)

1  
2  
3  
4 SPIRIT 2013 Checklist: Recommended items to address in a clinical trial protocol and related  
5 documents  
6  
7

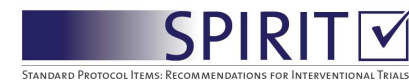

| Section/item               | Item No | Description                                                                                                                                                                                                                                                                              | Answer (DiaPROM trial)                                                                    |
|----------------------------|---------|------------------------------------------------------------------------------------------------------------------------------------------------------------------------------------------------------------------------------------------------------------------------------------------|-------------------------------------------------------------------------------------------|
| Title                      | 1       | Descriptive title identifying the study design, population, interventions, and, if applicable, trial acronym                                                                                                                                                                             | The title identify design, population, the intervention (use of PROMs) and trial acronym. |
| Trial registration         | 2a      | Trial identifier and registry name. If not yet registered, name of intended registry                                                                                                                                                                                                     | Trial registration number is included (p. 2 and 17).                                      |
|                            | 2b      | All items from the World Health Organization Trial Registration Data Set                                                                                                                                                                                                                 | All items have been checked and relevant items are included in the protocol.              |
| Protocol version           | 3       | Date and version identifier                                                                                                                                                                                                                                                              | Version 10.05.2018                                                                        |
| Funding                    | 4       | Sources and types of financial, material, and other support                                                                                                                                                                                                                              | Funding statement is included in the paper (p. 19).                                       |
| Roles and responsibilities | 5a      | Names, affiliations, and roles of protocol contributors                                                                                                                                                                                                                                  | Included                                                                                  |
|                            | 5b      | Name and contact information for the trial sponsor                                                                                                                                                                                                                                       | Name of trial sponsor is included (p.17).                                                 |
|                            | 5c      | Role of study sponsor and funders, if any, in study design; collection, management, analysis, and interpretation of data; writing of the report; and the decision to submit the report for publication, including whether they will have ultimate authority over any of these activities | Included (page 17, 19 and 20).                                                            |
|                            | 5d      | Composition, roles, and responsibilities of the coordinating centre, steering committee, endpoint adjudication committee, data management team, and other individuals or groups overseeing the trial, if applicable (see Item 21a for data monitoring committee)                         | N/A                                                                                       |
| <b>Introduction</b>        |         |                                                                                                                                                                                                                                                                                          |                                                                                           |
| Background and rationale   | 6a      | Description of research question and justification for undertaking the trial, including summary of relevant studies (published and unpublished) examining benefits and harms for each intervention                                                                                       | Included in the introduction section (p. 4) and aim section (p. 5) .                      |



|                                                           |     |                                                                                                                                                                                                                                                                                                                                                                                |                                                                                                                                                                                                                        |
|-----------------------------------------------------------|-----|--------------------------------------------------------------------------------------------------------------------------------------------------------------------------------------------------------------------------------------------------------------------------------------------------------------------------------------------------------------------------------|------------------------------------------------------------------------------------------------------------------------------------------------------------------------------------------------------------------------|
|                                                           | 6b  | Explanation for choice of comparators                                                                                                                                                                                                                                                                                                                                          | Described (p. 15)                                                                                                                                                                                                      |
| Objectives                                                | 7   | Specific objectives or hypotheses                                                                                                                                                                                                                                                                                                                                              | An overarching aim and study hypotheses are described in the aim section (p. 5)                                                                                                                                        |
| Trial design                                              | 8   | Description of trial design including type of trial (eg, parallel group, crossover, factorial, single group), allocation ratio, and framework (eg, superiority, equivalence, noninferiority, exploratory)                                                                                                                                                                      | Described in the method section (starts on p. 5)                                                                                                                                                                       |
| <b>Methods: Participants, interventions, and outcomes</b> |     |                                                                                                                                                                                                                                                                                                                                                                                |                                                                                                                                                                                                                        |
| Study setting                                             | 9   | Description of study settings (eg, community clinic, academic hospital) and list of countries where data will be collected. Reference to where list of study sites can be obtained                                                                                                                                                                                             | Study setting for feasibility-, pilot- and evaluation studies and participants are described in the method section (starts on p. 5) and in Table 1 (p. 6)                                                              |
| Eligibility criteria                                      | 10  | Inclusion and exclusion criteria for participants. If applicable, eligibility criteria for study centres and individuals who will perform the interventions (eg, surgeons, psychotherapists)                                                                                                                                                                                   | Described in the method section (starts on p. 5).                                                                                                                                                                      |
| Interventions                                             | 11a | Interventions for each group with sufficient detail to allow replication, including how and when they will be administered                                                                                                                                                                                                                                                     | Described in the method section (starts on p. 5).                                                                                                                                                                      |
|                                                           | 11b | Criteria for discontinuing or modifying allocated interventions for a given trial participant (eg, drug dose change in response to harms, participant request, or improving/worsening disease)                                                                                                                                                                                 | Described in the method section (p. 14)                                                                                                                                                                                |
|                                                           | 11c | Strategies to improve adherence to intervention protocols, and any procedures for monitoring adherence (eg, drug tablet return, laboratory tests)                                                                                                                                                                                                                              | N/A                                                                                                                                                                                                                    |
|                                                           | 11d | Relevant concomitant care and interventions that are permitted or prohibited during the trial                                                                                                                                                                                                                                                                                  | Described in the method section (p. 15)                                                                                                                                                                                |
| Outcomes                                                  | 12  | Primary, secondary, and other outcomes, including the specific measurement variable (eg, systolic blood pressure), analysis metric (eg, change from baseline, final value, time to event), method of aggregation (eg, median, proportion), and time point for each outcome. Explanation of the clinical relevance of chosen efficacy and harm outcomes is strongly recommended | Primary and secondary outcomes, analyses of data from each phases of the study, time point for collecting outcome measures and explanations for clinical relevance is included in the method section (starts on p. 5). |

|                                                                     |     |                                                                                                                                                                                                                                                                                                                                                          |                                                                                                                                                                                                                            |
|---------------------------------------------------------------------|-----|----------------------------------------------------------------------------------------------------------------------------------------------------------------------------------------------------------------------------------------------------------------------------------------------------------------------------------------------------------|----------------------------------------------------------------------------------------------------------------------------------------------------------------------------------------------------------------------------|
| Participant timeline                                                | 13  | Time schedule of enrolment, interventions (including any run-ins and washouts), assessments, and visits for participants. A schematic diagram is highly recommended (see Figure)                                                                                                                                                                         | Described in the method section (starts on p. 5). A figure describing the steps in the intervention is also included.                                                                                                      |
| Sample size                                                         | 14  | Estimated number of participants needed to achieve study objectives and how it was determined, including clinical and statistical assumptions supporting any sample size calculations                                                                                                                                                                    | The rationale for number of participants is described in the method section for the feasibility-, pilot – and evaluation study (starts on p. 5). The sample size calculation for the evaluation study is presented (p. 14) |
| Recruitment                                                         | 15  | Strategies for achieving adequate participant enrolment to reach target sample size                                                                                                                                                                                                                                                                      | How the feasibility- and pilot study will inform the evaluation study regarding the procedures for among others the participant enrolment is described (p. 13).                                                            |
| <b>Methods: Assignment of interventions (for controlled trials)</b> |     |                                                                                                                                                                                                                                                                                                                                                          |                                                                                                                                                                                                                            |
| Allocation:                                                         |     |                                                                                                                                                                                                                                                                                                                                                          |                                                                                                                                                                                                                            |
| Sequence generation                                                 | 16a | Method of generating the allocation sequence (eg, computer-generated random numbers), and list of any factors for stratification. To reduce predictability of a random sequence, details of any planned restriction (eg, blocking) should be provided in a separate document that is unavailable to those who enrol participants or assign interventions | Included in the method section (p. 14).                                                                                                                                                                                    |
| Allocation concealment mechanism                                    | 16b | Mechanism of implementing the allocation sequence (eg, central telephone; sequentially numbered, opaque, sealed envelopes), describing any steps to conceal the sequence until interventions are assigned                                                                                                                                                | Described in the method section (p. 14)                                                                                                                                                                                    |
| Implementation                                                      | 16c | Who will generate the allocation sequence, who will enrol participants, and who will assign participants to interventions                                                                                                                                                                                                                                | Described in the method section (p. 14)                                                                                                                                                                                    |
| Blinding (masking)                                                  | 17a | Who will be blinded after assignment to interventions (eg, trial participants, care providers, outcome assessors, data analysts), and how                                                                                                                                                                                                                | Described in the method section (p. 15).                                                                                                                                                                                   |
|                                                                     | 17b | If blinded, circumstances under which unblinding is permissible, and procedure for revealing a participant's allocated intervention during the trial                                                                                                                                                                                                     | The study is not blinded for the participants and the health care providers as stated (p. 15).                                                                                                                             |
| <b>Methods: Data collection, management, and analysis</b>           |     |                                                                                                                                                                                                                                                                                                                                                          |                                                                                                                                                                                                                            |

|                            |     |                                                                                                                                                                                                                                                                                                                                                                                                              |                                                                                                                                                                                   |
|----------------------------|-----|--------------------------------------------------------------------------------------------------------------------------------------------------------------------------------------------------------------------------------------------------------------------------------------------------------------------------------------------------------------------------------------------------------------|-----------------------------------------------------------------------------------------------------------------------------------------------------------------------------------|
| Data collection methods    | 18a | Plans for assessment and collection of outcome, baseline, and other trial data, including any related processes to promote data quality (eg, duplicate measurements, training of assessors) and a description of study instruments (eg, questionnaires, laboratory tests) along with their reliability and validity, if known. Reference to where data collection forms can be found, if not in the protocol | Plans for assessments are described in the method section (starts at p. 5). The study evaluation measures are described (p. 9). References to the included instruments are given. |
|                            | 18b | Plans to promote participant retention and complete follow-up, including list of any outcome data to be collected for participants who discontinue or deviate from intervention protocols                                                                                                                                                                                                                    | Described in the analysis section (p. 16)                                                                                                                                         |
| Data management            | 19  | Plans for data entry, coding, security, and storage, including any related processes to promote data quality (eg, double data entry; range checks for data values). Reference to where details of data management procedures can be found, if not in the protocol                                                                                                                                            | Data storage is described (p. 17). Data entry is described (p. 8, 12 and 16).                                                                                                     |
| Statistical methods        | 20a | Statistical methods for analysing primary and secondary outcomes. Reference to where other details of the statistical analysis plan can be found, if not in the protocol                                                                                                                                                                                                                                     | Statistical analysis plans for each study phase are included (p. 11, 13 and 16)                                                                                                   |
|                            | 20b | Methods for any additional analyses (eg, subgroup and adjusted analyses)                                                                                                                                                                                                                                                                                                                                     | Described (p. 16).                                                                                                                                                                |
|                            | 20c | Definition of analysis population relating to protocol non-adherence (eg, as randomised analysis), and any statistical methods to handle missing data (eg, multiple imputation)                                                                                                                                                                                                                              | Included in the data analysis section (p. 16)                                                                                                                                     |
| <b>Methods: Monitoring</b> |     |                                                                                                                                                                                                                                                                                                                                                                                                              |                                                                                                                                                                                   |
| Data monitoring            | 21a | Composition of data monitoring committee (DMC); summary of its role and reporting structure; statement of whether it is independent from the sponsor and competing interests; and reference to where further details about its charter can be found, if not in the protocol. Alternatively, an explanation of why a DMC is not needed                                                                        | None planned.                                                                                                                                                                     |

|                                 |     |                                                                                                                                                                                                                                  |                                                                    |
|---------------------------------|-----|----------------------------------------------------------------------------------------------------------------------------------------------------------------------------------------------------------------------------------|--------------------------------------------------------------------|
|                                 | 21b | Description of any interim analyses and stopping guidelines, including who will have access to these interim results and make the final decision to terminate the trial                                                          | None planned.                                                      |
| Harms                           | 22  | Plans for collecting, assessing, reporting, and managing solicited and spontaneously reported adverse events and other unintended effects of trial interventions or trial conduct                                                | Included in the Ethics and dissemination section (p. 17).          |
| Auditing                        | 23  | Frequency and procedures for auditing trial conduct, if any, and whether the process will be independent from investigators and the sponsor                                                                                      | Not planned.                                                       |
| <b>Ethics and dissemination</b> |     |                                                                                                                                                                                                                                  |                                                                    |
| Research ethics approval        | 24  | Plans for seeking research ethics committee/institutional review board (REC/IRB) approval                                                                                                                                        | Included (p.2 and 17).                                             |
| Protocol amendments             | 25  | Plans for communicating important protocol modifications (eg, changes to eligibility criteria, outcomes, analyses) to relevant parties (eg, investigators, REC/IRBs, trial participants, trial registries, journals, regulators) | Described in the Ethics and dissemination section (p. 17).         |
| Consent or assent               | 26a | Who will obtain informed consent or assent from potential trial participants or authorised surrogates, and how (see Item 32)                                                                                                     | The procedures is described in the method section (starts at p. 4) |
|                                 | 26b | Additional consent provisions for collection and use of participant data and biological specimens in ancillary studies, if applicable                                                                                            | N/A                                                                |
| Confidentiality                 | 27  | How personal information about potential and enrolled participants will be collected, shared, and maintained in order to protect confidentiality before, during, and after the trial                                             | Described in the Ethics and dissemination section (p. 17).         |
| Declaration of interests        | 28  | Financial and other competing interests for principal investigators for the overall trial and each study site                                                                                                                    | Included (p. 19)                                                   |
| Access to data                  | 29  | Statement of who will have access to the final trial dataset, and disclosure of contractual agreements that limit such access for investigators                                                                                  | Described in the Ethics and dissemination section (p. 17).         |
| Ancillary and post-trial care   | 30  | Provisions, if any, for ancillary and post-trial care, and for compensation to those who suffer harm from trial participation                                                                                                    | N/A                                                                |

|                            |     |                                                                                                                                                                                                                                                                                     |                                                            |
|----------------------------|-----|-------------------------------------------------------------------------------------------------------------------------------------------------------------------------------------------------------------------------------------------------------------------------------------|------------------------------------------------------------|
| Dissemination policy       | 31a | Plans for investigators and sponsor to communicate trial results to participants, healthcare professionals, the public, and other relevant groups (eg, via publication, reporting in results databases, or other data sharing arrangements), including any publication restrictions | Described in the Ethics and dissemination section (p. 17). |
|                            | 31b | Authorship eligibility guidelines and any intended use of professional writers                                                                                                                                                                                                      | N/A                                                        |
|                            | 31c | Plans, if any, for granting public access to the full protocol, participant-level dataset, and statistical code                                                                                                                                                                     | N/A                                                        |
| <b>Appendices</b>          |     |                                                                                                                                                                                                                                                                                     |                                                            |
| Informed consent materials | 32  | Model consent form and other related documentation given to participants and authorised surrogates                                                                                                                                                                                  | Not available in English.                                  |
| Biological specimens       | 33  | Plans for collection, laboratory evaluation, and storage of biological specimens for genetic or molecular analysis in the current trial and for future use in ancillary studies, if applicable                                                                                      | N/A                                                        |

\*It is strongly recommended that this checklist be read in conjunction with the SPIRIT 2013 Explanation & Elaboration for important clarification on the items. Amendments to the protocol should be tracked and dated. The SPIRIT checklist is copyrighted by the SPIRIT Group under the Creative Commons "[Attribution-NonCommercial-NoDerivs 3.0 Unported](#)" license.

# BMJ Open

## The use of Patient-Reported Outcome Measures (PROMs) in clinical diabetes consultations: study protocol for the DiaPROM randomized controlled trial pilot study.

|                                 |                                                                                                                                                                                                                                                                                                                                                                                                                                                                                                                                                                                                                                                                           |
|---------------------------------|---------------------------------------------------------------------------------------------------------------------------------------------------------------------------------------------------------------------------------------------------------------------------------------------------------------------------------------------------------------------------------------------------------------------------------------------------------------------------------------------------------------------------------------------------------------------------------------------------------------------------------------------------------------------------|
| Journal:                        | <i>BMJ Open</i>                                                                                                                                                                                                                                                                                                                                                                                                                                                                                                                                                                                                                                                           |
| Manuscript ID                   | bmjopen-2018-024008.R1                                                                                                                                                                                                                                                                                                                                                                                                                                                                                                                                                                                                                                                    |
| Article Type:                   | Protocol                                                                                                                                                                                                                                                                                                                                                                                                                                                                                                                                                                                                                                                                  |
| Date Submitted by the Author:   | 01-Nov-2018                                                                                                                                                                                                                                                                                                                                                                                                                                                                                                                                                                                                                                                               |
| Complete List of Authors:       | Haugstvedt, Anne; Hogskulen pa Vestlandet, Department of Health and Caring Sciences<br>Hernar, Ingvild; Hogskulen pa Vestlandet, Department of Health and Caring Sciences; Univeristy of Bergen, Department of Global Public Health and Primary Care<br>Strandberg, Ragnhild ; Hogskulen pa Vestlandet, Department of Health and Caring Sciences<br>Richards, David; University of Exeter, Medical School<br>Nilsen, Roy; Hogskulen pa Vestlandet, Department of Health and Caring Sciences<br>Tell, Grethe; University of Bergen, Department of Global Public Health and Primary Care<br>Graue, Marit; Hogskulen pa Vestlandet, Department of Health and Caring Sciences |
| <b>Primary Subject Heading</b>: | Diabetes and endocrinology                                                                                                                                                                                                                                                                                                                                                                                                                                                                                                                                                                                                                                                |
| Secondary Subject Heading:      | Patient-centred medicine                                                                                                                                                                                                                                                                                                                                                                                                                                                                                                                                                                                                                                                  |
| Keywords:                       | General diabetes < DIABETES & ENDOCRINOLOGY, Quality in health care < HEALTH SERVICES ADMINISTRATION & MANAGEMENT, Protocols & guidelines < HEALTH SERVICES ADMINISTRATION & MANAGEMENT                                                                                                                                                                                                                                                                                                                                                                                                                                                                                   |
|                                 |                                                                                                                                                                                                                                                                                                                                                                                                                                                                                                                                                                                                                                                                           |

SCHOLARONE™  
Manuscripts

1  
2  
3  
4 The use of Patient-Reported Outcome Measures (PROMs) in  
5  
6  
7  
8 clinical diabetes consultations: study protocol for the  
9  
10  
11 DiaPROM randomized controlled trial pilot study.  
12  
13  
14

15 Anne Haugstvedt,<sup>1</sup> Ingvild Hernar,<sup>1,2,3</sup> Ragnhild B Strandberg,<sup>1</sup> David Richards,<sup>4</sup>

16  
17 Roy M Nilsen,<sup>1</sup> Grethe S Tell,<sup>2</sup> Marit Graue<sup>1</sup>  
18  
19

20  
21 <sup>1</sup>Department of Health and Caring Sciences, Western Norway University of Applied Sciences,  
22  
23 Bergen, Norway  
24  
25

26 <sup>2</sup>Department of Global Public Health and Primary Care, University of Bergen, Bergen,  
27  
28 Norway  
29  
30

31 <sup>3</sup>Department of Medicine, Haukeland University Hospital, Bergen, Norway  
32  
33

34 <sup>4</sup>Institute for Health Research, University of Exeter Medical School, Exeter, UK  
35  
36

37 Correspondence to: Anne Haugstvedt, Department of Health and Caring Sciences, Western  
38  
39 Norway University of Applied Sciences, Post Box 7030, N-5020 Bergen, Norway. Tel: +47  
40  
41 55 58 78 88; Mobile +47 47 82 92 20. E-mail: [ahau@hvl.no](mailto:ahau@hvl.no)  
42  
43  
44  
45  
46

47 Word count in Abstract: 294  
48  
49

50 Word count in main text: 3795  
51  
52  
53  
54  
55  
56  
57  
58  
59  
60

## ABSTRACT

**Introduction** Although diabetes distress is found to be associated with decreased glycaemic control among adults with type 1 diabetes, the psychological and emotional impact of living with the condition is often not recognized and often underreported in diabetes care. Therefore, regular assessment of diabetes distress is recommended. Assessment of diabetes distress using Patient-Reported Outcome Measures (PROMs) in clinical practice has the potential to enhance care for people with diabetes by identifying problems and improving patient-clinician communication. In this study protocol, we describe a pilot randomized controlled trial (RCT) aiming to test the feasibility of all components of an empowerment-based intervention using PROMs as dialogue support in clinical diabetes consultations, and to address the uncertainties associated with running a fully powered evaluation study.

**Methods and analysis** We will undertake a two arm pilot RCT of an intervention utilising the Problem Areas In Diabetes scale (PAID) in clinical diabetes consultations in order to conclude whether a fully powered trial is appropriate and/or feasible. The study will also include qualitative in-depth interviews with participants and health care personnel. Our objectives are to: 1) evaluate the recruitment procedures and attrition rates; 2) evaluate the performance of the randomization procedure; 3) evaluate the participants' mean scores on the outcome measures before and after the intervention; 4) evaluate if the intervention consultations are acceptable and feasible; and 5) explore patients' and health care personnel's experiences with the use of PAID as dialogue support in clinical diabetes consultations. The quantitative data analysis includes descriptive statistics (frequencies, percentages, means, SD and CI). For the qualitative data, we will perform thematic analysis.



1  
2  
3 **Ethics and dissemination** Ethical approval has been obtained from the Western Norway  
4  
5 Regional Committee for Medical and Health Research Ethics (2017/1506/REC west). The  
6  
7 trial is registered in ClinicalTrials.gov (ID: NCT03471104).  
8  
9

10 **Keywords** Type 1 diabetes, Diabetes distress, Patient-Reported Outcome Measures  
11  
12 (PROMs), Complex intervention  
13  
14  
15  
16  
17  
18

### 19 **Strengths and limitations of the study**

20  
21

- 22 • This is a study with the potential to provide new knowledge about the use of Patient-  
23  
24 Reported Outcome Measures (PROMs) as dialogue support in clinical diabetes  
25  
26 consultations among patients with type 1 diabetes.  
27  
28
- 29 • The use of the Medical Research Council's framework as a guide for the development of  
30  
31 study intervention initiatives like this is a strength because the feasibility and uncertainties  
32  
33 related to a fully-powered RCT can be illuminated before a resource intensive fully  
34  
35 powered RCT is conducted.  
36  
37
- 38 • A key challenge includes possible contamination of the control group although the  
39  
40 completed PROMs will not be available in the electronic patient records (EPR) of the  
41  
42 participants in the control group.  
43  
44  
45  
46  
47  
48  
49  
50  
51  
52  
53  
54  
55  
56  
57  
58  
59  
60

## INTRODUCTION

The management of type 1 diabetes (T1D) is complex and people living with the condition need to make numerous daily choices related to their medical treatment.[1, 2] They need to monitor their blood glucose and administer insulin several times each day. The burden of living with T1D remains a challenge despite new insulin types and advances in insulin delivery and glucose monitoring technologies.[3] Many Norwegian adults with T1D do not achieve the recommended treatment goals for glycaemic control.[4, 5] This poor goal attainment might be due to inappropriate choice of insulin regimen for the individual, but research has also shown psychological and emotional aspects are important barriers to satisfactory diabetes self-management.[6]

The psychological and emotional impact of living with diabetes is often unrecognized and/or underreported in diabetes care.[7, 8] Diabetes distress, which reflects the emotional response to the burden, worries, anxieties, frustrations and stressors associated with managing diabetes in everyday life,[9, 10] is found to be associated with decreased glycaemic control.[11, 12] Therefore, regular assessment of diabetes distress is recommended.[13] Such assessment is considered feasible and beneficial to promote the recognition of psychological and emotional issues that affect diabetes self-management.[9, 14]

Collecting Patient-Reported Outcome Measures (PROMs) involves asking people to complete questionnaires concerning the impact of their condition and its treatment on their health.[15] The integration of PROMs in clinical practice has the potential to improve care for people with diabetes and other chronic conditions by screening for and identifying problems, monitoring progress over time, improving patient-clinician communication and enabling people to become more involved in managing their own health.[16] Therefore, the

1  
2  
3 overarching aim of the Diabetes Patient-Reported Outcome Measures trial (DiaPROM trial) is  
4  
5 to develop, test and evaluate the effectiveness of a structured empowerment-based  
6  
7 intervention using PROMs regarding diabetes distress as dialogue support in clinical diabetes  
8  
9 consultations among adults with T1D. Our proposition is that the DiaPROM intervention  
10  
11 initiative will reduce diabetes distress and further improve overall well-being, improve  
12  
13 perceived competence for diabetes management and improve glycaemic control. Based on  
14  
15 experiences, we also believe that improved focus on the psychological and emotional burden  
16  
17 of the disease will improve satisfaction with diabetes follow-up. This paper describes the  
18  
19 protocol for a pilot randomized controlled trial (RCT) to test the feasibility of and  
20  
21 uncertainties associated with a fully powered evaluation study.  
22  
23  
24  
25  
26

### 27 **The development of the DiaPROM trial**

28  
29  
30  
31 The DiaPROM trial is part of the implementation of PROMs in the Norwegian  
32  
33 Diabetes Register for Adults (NDR-A). We wanted to design a study to test a method for  
34  
35 utilizing the PROMs data in clinical diabetes practice. The study is multidisciplinary and  
36  
37 consists of several interacting components and a number of behaviours required by those  
38  
39 receiving and delivering the intervention. Thus, we consider the study as a complex  
40  
41 intervention with a need to develop and test the various components gradually before  
42  
43 conducting a fully powered RCT. As guidance in this process, we used the Medical Research  
44  
45 Council's framework (MRC framework) for the evaluation of complex interventions.[17, 18]  
46  
47  
48 The framework describes four important phases in the development, evaluation and  
49  
50 implementation of a new intervention initiative: (1) the development phase, (2) the feasibility  
51  
52 and piloting phase, (3) the evaluation phase and (4) the implementation phase (figure 1).  
53  
54  
55  
56  
57  
58  
59  
60

1  
2  
3 The development of the DiaPROM trial took place during 2016 and 2017. Initially,  
4 the essential tasks were to determine which PROMs to include and how patients should  
5 complete the PROMs.  
6  
7  
8  
9

### 10 *PROMs to include*

11  
12  
13  
14 We reviewed the literature to identify published articles on the use of PROMs as  
15 dialogue support in clinical diabetes practice. We wanted to identify the most common used  
16 PROMs to measure diabetes distress. We recognized that studies have primarily used PROMs  
17 to evaluate interventions' effects; relatively few publications have reported on the use of  
18 PROMs in clinical diabetes care. We did identify, however, a multi-centre study across eight  
19 countries that had tested the feasibility and impact of a procedure for implementing PROMs  
20 in routine diabetes care.[14, 19] This computer-assisted "Monitoring of Individual Needs in  
21 Diabetes" procedure aimed to improve recognition and management of the psychological  
22 needs of patients with diabetes in routine care. Regular assessment of psychological needs  
23 was implemented as part of the annual review in diabetes clinics. The assessment included  
24 diabetes distress measured by the Problem Areas in Diabetes (PAID) scale. Accordingly,  
25 Schmitt *et al.*[20] emphasize the necessity of a justified choice of measurement and  
26 recommend the use of the PAID when the clinical purpose is to bear in mind a variety of  
27 emotional concerns related to living with diabetes. Some other studies have reported PAID as  
28 an appropriate instrument for use in clinical diabetes consultations, as well.[21-25] The scale  
29 may contribute to improved communication by making the dialogue between health care  
30 providers and patients more therapeutic and goal oriented.  
31  
32  
33  
34  
35  
36  
37  
38  
39  
40  
41  
42  
43  
44  
45  
46  
47  
48  
49  
50  
51  
52  
53  
54  
55  
56  
57  
58  
59  
60

### *Patient and public involvement*

Involving health service users throughout all phases of a study is important to provide insight into patients' perspectives and ensure that the research focuses on issues relevant for the health service users and the public.[26, 27] Patient and public involvement (PPI) is also useful in terms of shaping the research processes.[26] In this study, we used the GRIPP2 short form as guidance for including and reporting PPI.[27] To include the voice of the health service users throughout the study, two people with diabetes have been included in the DiaPROM project group, both experienced with PPI and research. They will contribute to all phases of the study. Furthermore, we have included additional people with diabetes to share their views on the various phases of the study, recruited mainly from national and local diabetes associations.

A crucial question when we considered which PROMs to include in the study, was what adult people with T1D perceived as the most important and relevant aspects to emphasize in diabetes follow-up. Thus, in parallel with the literature review, we consulted the health service users. In addition to the health service users in the project group, we met the leader of the Norwegian Diabetes Association and a group of four representatives from the local diabetes association (two with T1D and two parents of children with T1D where one had type 2 diabetes herself). First, we used open question to the health service users to determine which topics they perceived as important and relevant to include in a set of PROMs. After an open discussion, we asked them to review several generic instruments (e.g. World Health Organization's 5-item well-being index (WHO-5), RAND-12 Health Status Inventory (RAND-12), Patient Activation Measure (PAM)) and diabetes-specific instruments (e.g. PAID, Diabetes Distress Scale (DDS), Perceived Competence for Diabetes Scale (PCDS)). The user representatives considered the advantages and shortcomings of using the 20

1  
2  
3 statements in PAID as dialogue support in the intervention. They found the instrument  
4  
5 relevant and suitable to be used in the intervention.  
6  
7

### 8 9 *The PAID*

10  
11  
12 Based on the literature review and in accordance with the input from the health service  
13  
14 users, we chose the PAID scale for use in the study intervention. The participants' PAID  
15  
16 scores will constitute the basis for the dialogue in the clinical consultations. The scale was  
17  
18 developed to gain insight into the breadth of emotional responses to living with diabetes, and  
19  
20 consists of 20 statements regarding diabetes distress (e.g. "feeling constantly concerned about  
21  
22 food and eating", "worrying about low blood sugar reactions").[28-30] The scores are on a 5-  
23  
24 point Likert scale from 0 (not a problem) to 4 (serious problem). An item score of 3  
25  
26 (somewhat serious problem) or 4 (serious problem) indicates moderate to serious diabetes  
27  
28 distress related to the specific item. Scale scores are transformed to a 0-100 scale, with higher  
29  
30 scores indicating greater distress, and a PAID total score >40 suggests serious diabetes-related  
31  
32 distress. To identify both moderate and serious distress, we defined scores of concern as  
33  
34 PAID total scores  $\geq 30$  or single item scores of 3 or 4. The scale has been translated into  
35  
36 several languages, including Norwegian.[31]  
37  
38  
39  
40  
41  
42

### 43 *Method for completing PROMs*

44  
45  
46 The literature describes various methods for administration of PROMs such as paper-  
47  
48 based self-administration at home or in the clinic, interviews by telephone or personal  
49  
50 meetings, computer-assisted self-administration in the clinic or mail- or web-based  
51  
52 administration from patients' homes.[16] In our study, we decided on computer-assisted  
53  
54 administration on a touchscreen computer in the outpatient clinic. Using this method has  
55  
56 advantages, such as efficient and simultaneous data entry and minor privacy challenges.  
57  
58  
59  
60

### *Feasibility study*

We conducted a feasibility study in 2017 to examine the technical and practical feasibility of collecting PROMs on a touchscreen computer in the outpatient clinic, and evaluate the participants' perceived understanding and relevance of the items in the PAID and the included outcome measures. We also evaluated the acceptability of completing PROMs annually. Field observations and comments from the participants provided data on the technical and practical procedures. Sixty-nine individuals with T1D  $\geq 40$  years participated in the study and 83% of them reported that, to a high or a very high degree, they would be positive about an annual completion of PROMs. However, almost 20% of 137 invited patients did not show up at the clinic (change of appointments, sick, no reason given), and most of the invited ones did not go directly to the computer on arrival at the clinic as instructed in the information sheet. Thus, we developed clearer information and procedures for the pilot study to avoid loss of potential participants among those invited. Further analyses of the results from the feasibility study are ongoing, and we plan to publish these in a separate article.

### **Aim**

The purpose of the pilot RCT reported here is to test the feasibility of the proposed DiaPROM trial components and address the uncertainties associated with running a fully powered RCT, in order to conclude whether such a trial is appropriate and/or feasible. Our objectives are to:

1. evaluate the recruitment procedures and attrition rates;
2. evaluate the performance of the randomization procedure;
3. evaluate the participants' mean scores on the outcome measures before and after the intervention;

4. evaluate if the intervention consultations are acceptable and feasible; and
5. explore patients' and health care personnel's experiences with the use of PAID as dialogue support in clinical diabetes consultations.

## METHODS AND ANALYSIS

We will undertake a two arm pilot RCT with embedded qualitative study on participants' and health care providers' views of the DiaPROM intervention initiative. We report our protocol here using the SPIRIT checklist (<http://www.spirit-statement.org/wp-content/uploads/2013/01/SPIRIT-Checklist-download-8Jan13.pdf>).

### Participants and eligibility criteria

As recommended for pilot RCTs,[32] we will include 80 participants: 40 in the intervention group and 40 controls. Participants will have T1D for at least 1 year and be aged  $\geq 18$  to  $< 40$  years. We will exclude people who are unable to read or complete the PROMs on the touchscreen computer. Furthermore, we will exclude pregnant woman, patients with known and recorded cognitive deficiency (e.g. Down's syndrome, Alzheimer), severe somatic comorbidity (e.g. end stage renal disease, severe heart failure, severe cancer), and/or a major psychiatric diagnosis (e.g. severe depression, bipolar disorder, schizophrenia) as diabetes distress is often neither ethical nor possible to discuss with these group of patients. Eligible participants will receive information and consent forms by regular mail before their annual diabetes consultation at the clinic. The information form will include information about the possibility to withdraw from the study at any time point without consequences.



## Randomization procedure and allocation concealment

We will randomize eligible and consenting participants, using computer-generated block randomization at the patient level, stratified for gender, immediately after the participants have completed both the PAID and the self-reported outcome measures. When participants complete the measures on the touchscreen computer in the outpatient clinic, they will receive an individual four-character code. When the physician downloads the PROMs data using the code, a concealed computerized allocation will take place. Information about which group the person is allocated to will appear on the computer screen and the physician will inform the participant immediately. It is not possible to blind either participants or health care providers.

## Trial intervention

After participants have completed the PAID scale, physicians download the scores into the participants' electronic patient record (EPR) as part of the annual consultation (figure 2). Physicians then review and discuss the PAID scores briefly with participants. Participants with one or more single PAID item(s) score of 3 or 4 (somewhat serious or serious problem), or PAID total score  $\geq 30$ , will be referred to additional diabetes nurse consultations. Participants with lower scores will receive regular follow-up according to usual clinical protocols.

Additional nurse follow-up will consist of at least two consultations. The first will take place within four weeks after randomization, and the second within a further three months. After the second nurse consultation, the nurse and the participant will agree any further follow-up until the next annual consultation with the physician. Diabetes nurses will review PAID scores and discuss the reported problem areas and distress with participants by

1  
2  
3 following a communication manual based on key elements from empowerment theory and  
4 self-determination theory, such as empathetic communication and autonomy support.[33-35]  
5  
6 These communication skills involve “active listening”, “asking open questions”,  
7  
8 “responding”, “summing up” and “agreeing on goals and actions to take”. Nurses will record  
9  
10 their work on participants’ problem areas, goals and actions. The intervention will last for a  
11  
12 maximum of one year, until the next annual consultation.  
13  
14  
15  
16  
17

### 18 **Control procedure**

19  
20  
21 The control group will receive “care as usual” which does not include a structured  
22  
23 focus on psychological and emotional diabetes distress. For most patients the annual  
24  
25 consultation normally constitute “care as usual”. Although all participants will complete the  
26  
27 PAID before randomization, for control participants the scores will not be accessible to  
28  
29 clinicians in the EPR until the study is completed. For ethical reasons, we will not prevent  
30  
31 physicians discussing psychological or emotional issues with participants in the control group  
32  
33 if participants specifically raise such an issue. Unlike participants in the intervention group,  
34  
35 such discussions will not be structured with reference to PAID data. We will identify to what  
36  
37 extent such discussions have taken place by reviewing participants’ EPR.  
38  
39  
40  
41  
42  
43

### 44 **Training of health care personnel**

45  
46  
47 Before the study commences, we will have a one-hour meeting with the participating  
48  
49 physicians, and they will be trained in how to download the PAID scores into the EPR and  
50  
51 how to briefly discuss the scores in the annual consultations. Further, they will get both oral  
52  
53 information and written instructions regarding the interpretation of the PAID scores including  
54  
55 instructions on the criteria for referral of participants to extra follow-up by the diabetes  
56  
57 nurses. Nurses will get both oral and written information and a 2 x 1 hour training in how to  
58  
59  
60

1  
2  
3 interpret scores and discuss the reported problem areas, how to follow the communication  
4 manual in the consultations, and how to agree upon goals and actions to take with the  
5 participants.  
6  
7  
8  
9

## 10 **Data collection and outcome measures**

11  
12  
13  
14  
15 All participants (both intervention and control groups) will complete the outcome  
16 measures electronically before the annual consultation at baseline and after 12 months. After  
17 the annual consultation, the participants will complete a paper-based questionnaire about their  
18 experience and satisfaction with the diabetes follow-up. We will evaluate the recruitment  
19 procedures and attrition rates by observing and monitoring number of eligible participants  
20 invited, number of invited people declining participation, number of people who attended the  
21 clinic, number of intervention participants attended the nurse consultations, and number of  
22 consultations conducted. We will also observe and document the technical performance of the  
23 randomization procedure. Finally, we will document all types of contacts between participants  
24 and the diabetes outpatient clinic for all participants throughout the study period.  
25  
26  
27  
28  
29  
30  
31  
32  
33  
34  
35  
36  
37  
38

39 To describe the study sample and evaluate the technical procedure of data retrieval  
40 from EPR, we will perform a computerized retrieval of the following variables from the  
41 participants' EPR: sex, age, ethnicity, body mass index, diabetes duration, HbA<sub>1c</sub> (secondary  
42 outcome), insulin regimen, insulin doses, severe hypoglycaemic episodes needing assistance  
43 in the past year, hospitalizations, co-morbidities and diabetes late complications.  
44  
45  
46  
47  
48  
49  
50

51 The outcome measures to evaluate the effect of the intervention in the evaluation  
52 phase of the study (phase 3), were chosen based on a literature review and considerations  
53 among the researchers and the health service users. We decided upon the DDS as primary  
54 outcome. DDS measures diabetes distress and contains 17 items and 4 subscales: emotional  
55  
56  
57  
58  
59  
60

1  
2  
3 burden (5 items), physician-related distress (4 items), regimen distress (5 items) and diabetes-  
4 related interpersonal distress (3 items).[36] The scores are on a 6-point Likert scale from 1  
5 (not a problem) to 6 (serious problem) with mean total or subscale score from 1 to 6.[37]  
6  
7  
8 Total or subscale scores >3 are defined as high levels of distress. The DDS has previously  
9 shown satisfactory psychometric properties to map diabetes distress, and might have  
10 advantages for use as outcome measure in clinical trials because it contributes to identify sub-  
11 domains of distress.[11, 20, 31] To measure the secondary outcomes, overall well-being and  
12 perceived diabetes competence, we have included the WHO-5[38-40] and the PCDS.[41-43]  
13  
14 We will use HbA1c as the target for glycaemic control.

15  
16  
17 We will invite all participants from the intervention group and all health care  
18 personnel (physicians and diabetes nurses) participating in the intervention group to  
19 individual in-depth interviews to collect qualitative data on their experiences with the  
20 intervention, including the use of PAID as dialogue support in clinical consultations. This will  
21 provide a sample of about 15-20 participants and 10-15 health care personnel. All interviews  
22 will be conducted at the outpatient clinic, and will be audio recorded after obtaining consent  
23 from participants.

## 24 25 26 **Data analysis**

27  
28 We will use Stata SE 15 for Windows for all statistical analyses,[44] and for data entry  
29 range checks for data values will be performed. We will report the recruitment of participants  
30 and the number of trial dropouts descriptively (frequencies and percentages). Further, we will  
31 report the means, SD and CI of the DDS and the other outcome measurements before and  
32 after the intervention period for both the intervention and control groups. As the study is a  
33 pilot and the sample size is small, we will not perform inferential statistics and analyze

1  
2  
3 between group calculations. The participants' PAID scores will be analysed descriptively  
4  
5 (mean, SD), as well.  
6  
7

8  
9 We will transcribe verbatim and analyse participants' and health care personnel's  
10  
11 experiences with the intervention, by using thematic analysis.[45] Thematic analysis is a  
12  
13 flexible qualitative method without any specific theoretical foundation and consists of six  
14  
15 steps: 1) transcribing, reading and re-reading, 2) generating initial codes, 3) searching for  
16  
17 themes, 4) reviewing themes, 5) defining and naming the themes, and 6) producing the report.  
18  
19

## 20 21 **ETHICS AND DISSEMINATION** 22 23

24  
25  
26 The Norwegian Regional Committee for Medical and Health Research Ethics has  
27  
28 approved the study (2017/1506/REK west). Haukeland University Hospital, Bergen, Norway  
29  
30 is the responsible research institution (trial sponsor) where the study data will be stored on a  
31  
32 secure research server. In order to protect confidentiality, names of the potential and enrolled  
33  
34 participants will be stored separate from the other study data. Only the principle investigator  
35  
36 and other clearly identified members of the project group have access to the study data. If  
37  
38 important protocol modifications happen, this will be communicated to the ethic committee  
39  
40 and ClinicalTrials.gov. Further information can be obtained from ClinicalTrials.gov,  
41  
42 registration number NCT03471104.  
43  
44  
45

46  
47  
48 Completing the PROMs may activate latent psychological or psychosocial problems  
49  
50 and negative feelings. To care for any participants in the control group reporting worryingly  
51  
52 high levels of distress (e.g. above cut points for severe levels of distress measured by PAID  
53  
54 and/or DDS), the research team will continuously review the reported distress levels. We will  
55  
56 discuss potential needs for more intensive care or referral to psychological or psychiatric  
57  
58  
59  
60

1  
2  
3 follow-up for those reporting worryingly levels of distress with the physicians and diabetes  
4  
5 nurses.  
6  
7

8  
9 We will present the findings of the study phases at national and international  
10 conferences and submit manuscripts to peer-reviewed journals and popular science journals.  
11  
12 Further, we will also publish the findings in popular science journals, public newspapers and  
13  
14 journals for relevant user groups. One of the health service users will participate in the writing  
15  
16 and publication process.  
17  
18

## 21 **DISCUSSION**

22  
23  
24  
25  
26 In the pilot RCT study described in this protocol, we aim to test the feasibility of, and  
27  
28 address the clinical and methodological uncertainties associated with running a fully powered  
29  
30 RCT testing the effect of an intervention incorporating the use of PAID to decrease diabetes  
31  
32 distress among people with T1D. The study will provide knowledge on the use of PAID in  
33  
34 clinical diabetes practice, although the purpose primarily is to prepare the ground for the  
35  
36 design and conduct of a full powered RCT.  
37  
38

39  
40 Diabetes distress has been shown to be a barrier for satisfactory glycaemic control,  
41  
42 [11, 12] and a more structured focus on diabetes distress, may have the potential to improve  
43  
44 long-term health for people with T1D by reducing the distress and improving glycaemic  
45  
46 control. A previous literature review by Carlsen *et al.*[46] found that the use of PAID could  
47  
48 benefit patients but emphasized the need for follow-up studies to evaluate whether the PAID  
49  
50 should be implemented in routine diabetes care to enhance a more structured focus on  
51  
52 diabetes distress. The choice of utilizing PAID as dialogue support in the intervention and the  
53  
54 DDS as the primary outcome measure is in accordance with previous research. Both  
55  
56 instruments have previously shown satisfactory psychometric properties to map individual  
57  
58  
59  
60

1  
2  
3 levels of diabetes distress, but it has been claimed that the PAID has advantages for use in  
4 clinical practice and that the DDS have advantages for use in clinical trials, because it also  
5 contributes to identifying sub-domains of distress.[11, 20, 31]  
6  
7  
8  
9

## 10 11 **Strengths and limitations** 12

13  
14 The use of the MRC framework is a strength in the development of this study, because  
15 it includes several complex and interacting components that need to be considered and tested  
16 with the purpose to reveal uncertainties before conducting a fully powered RCT. In addition,  
17 the use of the GRIPP2 short form to guide the PPI throughout all phases of the development  
18 of the intervention initiative is considered a strength. The health service users included in the  
19 project have influenced among others the choice of PROMs, the choice of the theoretical  
20 foundation for the intervention, and the discussions related to the qualitative component of the  
21 study.  
22  
23  
24  
25  
26  
27  
28  
29  
30  
31  
32

33 We have included primarily disease-specific outcome measures, but also one generic  
34 PROM (WHO-5). Disease-specific PROMs are used to capture information that is most  
35 pertinent to particular patient groups, but they might miss domains affecting the patient that  
36 are unrelated to their disease.[16, 47] Generic instruments may capture broad dimensions of  
37 health and allow for comparisons between populations but might not be sensitive to changes  
38 in disease-specific health domains over time or in relation to interventions.[15]  
39  
40  
41  
42  
43  
44  
45  
46  
47

48 The fact that the control group in the study will also complete the PAID and the  
49 evaluation PROMs before the annual diabetes consultation, and that the same physicians meet  
50 participants from both the intervention and the control groups might lead to intervention  
51 contamination challenges. This might be a challenge although the scores will not be  
52 accessible in the electronic patient records of participants in the control group.  
53  
54  
55  
56  
57  
58  
59  
60

## Acknowledgements

Thanks to the Norwegian Nurses Association, the Norwegian Diabetes Association and Western Norway University of Applied Sciences for funding the study. Thanks also to the Norwegian Diabetes Register for Adults and DIPS AS for fruitful collaboration. Further, we thank all the health care personnel and the health care service user representatives involved in the study. Thanks also to senior research fellow Peter Craig for giving us the permission to reproduce the figure describing the study phases in the development of a complex intervention.

## Contributors

AH and MG applied for funding of the trial. AH, IH, MG and RBS designed the study with involvement of GST, DR and RMN. AH wrote the first draft of the study protocol. All other authors have edited and critically reviewed the manuscript, and all authors read and approved the final version.

## Funding

The study is funded by the Norwegian Nurse Association, Western Norway University of Applied Sciences, the Norwegian Diabetes Association and the Norwegian Diabetes Register for Adults. The first two funded a postdoctoral position and a PhD position, respectively. The last two contributed with running funds.

## Competing interests

None declared.



## Patient consent

There is no patient data included in this report.

## REFERENCES

1. American Association of Diabetes Educators (ADE). AADE7 Self-Care Behaviors. *Diabetes Educ* 2008;34:445-9.
2. American Diabetes Association (ADA). Introduction: standards of medical care in diabetes. *Diabetes Care* 2018;41(Suppl 1):1-2. Available from: <https://doi.org/10.2337/dc18-Sint01> (Accessed Jan 22, 2018).
3. Jones A, Vallis M, Pouwer F. If it does not significantly change HbA 1c levels why should we waste time on it? A plea for the prioritization of psychological well-being in people with diabetes. *Diabet Med* 2015;32:155-63.
4. Cooper JG, Claudi T, Thordarson HB, *et al.* Treatment of type 1 diabetes in the specialist health service-data from the Norwegian Diabetes Register for Adults. *J Norwegian Med Assoc* 2013;133:2257.
5. Carlsen S, Skrivarhaug T, Thue G, Cooper JG, Goransson L, Lovaas K, *et al.* Glycemic control and complications in patients with type 1 diabetes - a registry-based longitudinal study of adolescents and young adults. *Pediatr Diabetes* 2017;18:188-95.
6. Pouwer F, Nefs G, Nouwen A. Adverse effects of depression on glycemic control and health outcomes in people with diabetes: a review. *Endocrinol Metab Clin North Am* 2013;42:529-44.

- 1  
2  
3 7. Pouwer F, Beekman ATF, Lubach C, *et al.* Nurses' recognition and registration of  
4 depression, anxiety and diabetes-specific emotional problems in outpatients with  
5 diabetes mellitus. *Patient Educ Couns* 2006;60:235-40.  
6  
7
- 8  
9  
10 8. Peyrot M, Rubin RR, Lauritzen T, *et al.* Psychosocial problems and barriers to  
11 improved diabetes management: results of the Cross-National Diabetes Attitudes,  
12 Wishes and Needs (DAWN) Study. *Diabet Med* 2005;22:1379-85.  
13  
14
- 15 9. Fisher L, Gonzalez JS, Polonsky WH. The confusing tale of depression and distress in  
16 patients with diabetes: a call for greater clarity and precision. *Diabet Med*  
17 2014;31:764-72.  
18  
19
- 20 10. Snoek FJ, Bremmer MA, Hermanns N. Constructs of depression and distress in  
21 diabetes: time for an appraisal. *Lancet Diabetes Endocrinol* 2015;3:450-60.  
22  
23
- 24 11. Strandberg RB, Graue M, Wentzel-Larsen T, *et al.* Longitudinal relationship between  
25 diabetes-specific emotional distress and follow-up HbA<sub>1c</sub> in adults with Type 1  
26 diabetes mellitus. *Diabet Med* 2015;32:1304-10.  
27  
28
- 29 12. Fisher L, Hessler D, Polonsky W, *et al.* Diabetes distress in adults with type 1  
30 diabetes: Prevalence, incidence and change over time. *J Diabetes Complications*  
31 2016;30:1123-8.  
32  
33
- 34 13. International Diabetes Federation. *International Diabetes Federation Diabetes Atlas*  
35 [Online]. 8th ed. International Diabetes Federation; 2017. Available from:  
36 <<http://www.diabetesatlas.org/resources/2017-atlas.html>> (accessed Jan 15, 2018).  
37  
38
- 39 14. Snoek FJ, Kersch NY, Eldrup E, *et al.* Monitoring of Individual Needs in Diabetes  
40 (MIND)-2: follow-up data from the cross-national Diabetes Attitudes, Wishes, and  
41 Needs (DAWN) MIND study. *Diabetes Care* 2012;35:2128-32.  
42  
43  
44  
45  
46  
47  
48  
49  
50  
51  
52  
53  
54  
55  
56  
57  
58  
59  
60

- 1  
2  
3 15. Greenhalgh J, Dalkin S, Gooding K, *et al.* Functionality and feedback: a realist  
4  
5 synthesis of the collation, interpretation and utilisation of patient-reported outcome  
6  
7 measures data to improve patient care. *Health Serv Deliv Res* 2017;5.2.  
8  
9
- 10  
11 16. Snyder CF, Aaronson NK, Choucair AK, *et al.* Implementing patient-reported  
12  
13 outcomes assessment in clinical practice: a review of the options and considerations.  
14  
15 *Qual Life Res* 2012;21:1305-14.  
16
- 17  
18 17. Craig P, Dieppe P, Macintyre S, *et al.* Developing and evaluating complex  
19  
20 interventions: the new Medical Research Council guidance. *BMJ* 2008;337:979-83.  
21  
22
- 23  
24 18. Craig, P. Developing and evaluating complex interventions: reflections on the 2008  
25  
26 MRC guidance. *Int J Nurs Stud* 2013;50:585-92.  
27
- 28  
29 19. Snoek, FJ, Kersch NY, Eldrup E, *et al.* Monitoring of Individual Needs in Diabetes  
30  
31 (MIND): baseline data from the cross-national Diabetes Attitudes, Wishes, and Needs  
32  
33 (DAWN) MIND study. *Diabetes Care* 2011;34:601-3.  
34
- 35  
36 20. Schmitt A, Reimer A, Kulzer B, *et al.* How to assess diabetes distress: comparison of  
37  
38 the Problem Areas in Diabetes Scale (PAID) and the Diabetes Distress Scale (DDS).  
39  
40 *Diabet Med* 2016;33:835-43.  
41
- 42  
43 21. Chawla A, Saha C, Marrero DG. A novel application of the problem areas in diabetes  
44  
45 (PAID) instrument to improve glycemic control and patient satisfaction. *Diabetes*  
46  
47 *Educ* 2010;36:337-44.  
48  
49
- 50  
51 22. van Bastelaar KMP, Pouwer F, Geelhoed-Duijvestijn PHLM, *et al.* Diabetes-specific  
52  
53 emotional distress mediates the association between depressive symptoms and  
54  
55 glycemic control in type 1 and type 2 diabetes. *Diabet Med* 2010;27:798-803.  
56  
57  
58  
59  
60

- 1  
2  
3 23. Meeuwissen JAC, Hollemann GJM, de Jong FJ, *et al.* Screening and guided self-help  
4 intervention for anxiety and depression in patients with type 2 diabetes. A new role for  
5 diabetes nurses in primary care? *Eur Diabetes Nurs* 2011;8:47-52.  
6  
7
- 8  
9  
10 24. Fleer J, Tovote KA, Keers JC, *et al.* Screening for depression and diabetes-related  
11 distress in a diabetes outpatient clinic. *Diabet Med* 2013;30:88-94.  
12  
13
- 14  
15 25. Reddy J, Wilhelm K, Campell L. Putting PAID to diabetes-related distress: the  
16 potential utility of the problem areas in diabetes (PAID) scale in patients with diabetes.  
17 *Psychosomatics* 2013;54:44-51.  
18  
19
- 20  
21 26. Staley K. 'Is it worth doing?' Measuring the impact of patient and public involvement  
22 in research. *Res Involv Engagem* 2015; 1:6.  
23  
24
- 25  
26 27. Staniszewska S, Brett J, Simera I, *et al.* GRIPP2 reporting checklists: tools to improve  
27 patient and public involvement in research. *BMJ* 2017;358:j3453.  
28  
29
- 30  
31 28. Polonsky WH, Anderson BJ, Lohrer PA, *et al.* Assessment of diabetes-related distress.  
32 *Diabetes Care* 1995;18:754-60.  
33  
34
- 35  
36 29. Welch GW, Jacobson AM, Polonsky WH. The Problem Areas in Diabetes scale: an  
37 evaluation of its clinical utility. *Diabetes Care* 1997;20:760-6.  
38  
39
- 40  
41 30. Welch G, Weinger K, Anderson B, *et al.* Responsiveness of the Problem Areas in  
42 Diabetes (PAID) questionnaire. *Diabet Med* 2003;20:69-72.  
43  
44
- 45  
46 31. Graue M, Haugstvedt A, Wentzel-Larsen T, *et al.* Diabetes-related emotional distress  
47 in adults: reliability and validity of the Norwegian versions of the Problem Areas in  
48 Diabetes Scale (PAID) and the Diabetes Distress Scale (DDS). *Int J Nurs Stud*  
49  
50  
51  
52  
53  
54  
55  
56  
57  
58  
59  
60

- 1  
2  
3 32. Richards DA, Hallberg IR. Section 2. Investigating feasibility and undertaking pilot  
4 testing of complex interventions. *Complex Interventions in Health. An Overview of*  
5  
6 *Research Methods*. Routledge; 2015:121-82.  
7  
8  
9  
10 33. Anderson RM, Funnell M. *The Art of Empowerment: Stories and Strategies for*  
11 *Diabetes Educators*. Alexandria, Virginia: American Diabetes Association; 2000.  
12  
13  
14  
15 34. Deci EL, Ryan RM. *Handbook of Self-determination Research*. Rochester, NY:  
16 University of Rochester Press; 2002.  
17  
18  
19  
20 35. Zoffmann V, Hörnsten Å, Storbækken S, *et al*. Translating person-centered care into  
21 practice: a comparative analysis of motivational interviewing, illness-integration  
22 support, and guided self-determination. *Patient Educ Couns* 2016;99:400-7.  
23  
24  
25  
26  
27 36. Polonsky WH, Fisher L, Psyd JE, *et al*. Assessing psychosocial distress in diabetes –  
28 development of the Diabetes Distress Scale. *Diabetes Care* 2005;28:626-31.  
29  
30  
31  
32 37. Fisher L, Hessler D, Glasgow RE, *et al*. REDEEM: a pragmatic trial to reduce diabetes  
33 distress. *Diabetes Care* 2013;36:2551-8.  
34  
35  
36  
37  
38 38. de Wit M, Pouwer F, Gemke RBJ, *et al*. Validation of the WHO-5 Well-Being Index  
39 in adolescents with type 1 diabetes. *Diabetes Care* 2007;30:2003-6.  
40  
41  
42  
43 39. Hajos TR, Pouwer F, Skovlund SE, *et al*. Psychometric and screening properties of the  
44 WHO-5 well-being index in adult outpatients with Type 1 or Type 2 diabetes mellitus.  
45 *Diabet Med* 2013;30:e63-9.  
46  
47  
48  
49  
50 40. Topp CW, Østergaard SD, Søndergaard S, *et al*. The WHO-5 Well-Being Index: a  
51 systematic review of the literature. *Psychother Psychosom* 2015;84:167-76.  
52  
53  
54  
55  
56  
57  
58  
59  
60

- 1  
2  
3 41. Williams GC, McGregor HA, Zeldman A, et al. Testing a self-determination theory  
4 process model for promoting glycemic control through diabetes self-management.  
5  
6 *Health Psychol* 2004;23:58-66.  
7  
8  
9  
10 42. Williams GC, McGregor HA, King D, et al. Variation in perceived competence,  
11 glycemic control, and patient satisfaction: relationship to autonomy support from  
12 physicians. *Patient Educ Couns* 2005;57:39-45.  
13  
14  
15  
16  
17 43. Mohn J, Graue M, Assmus J, et al. Self-reported diabetes self-management  
18 competence and support from healthcare providers in achieving autonomy are  
19 negatively associated with diabetes distress in adults with type 1 diabetes. *Diabet Med*  
20 2015;32:1513-19.  
21  
22  
23  
24  
25  
26  
27 44. StataCorp LLC. STATA Data Analysis and Statistical Software. Stata SE 15 ed.  
28 College Station, Texas, USA: StataCorp LLC; 2018.  
29  
30  
31  
32 45. Braun V, Clark V. Using thematic analysis in psychology. *Qual Res Psychol*  
33 2008;3:77-101.  
34  
35  
36  
37 46. Carlsen K, Haugstvedt A, Graue M. [PAID as screening and working tool in clinical  
38 consultations]. *Norwegian J Clin Nurs* 2015;10:228-37 [in Norwegian].  
39  
40  
41  
42 47. Black N, Burke L, Forrest CB, et al. Patient-reported outcomes: pathways to better  
43 health, better services, and better societies. *Qual Life Res* 2016;25:1103-12.  
44  
45  
46  
47  
48  
49  
50  
51  
52  
53  
54  
55  
56  
57  
58  
59  
60

1  
2  
3 **Figure 1.** Key elements in the Medical Research Council’s guidance for developing,  
4  
5 evaluating and implementing complex interventions (MRC framework). Reproduced  
6  
7 from Craig *et al.*[17] with permission.  
8  
9

10  
11 **Figure 2.** The study intervention in the DiaPROM trial.  
12  
13  
14  
15  
16  
17  
18  
19  
20  
21  
22  
23  
24  
25  
26  
27  
28  
29  
30  
31  
32  
33  
34  
35  
36  
37  
38  
39  
40  
41  
42  
43  
44  
45  
46  
47  
48  
49  
50  
51  
52  
53  
54  
55  
56  
57  
58  
59  
60

For peer review only

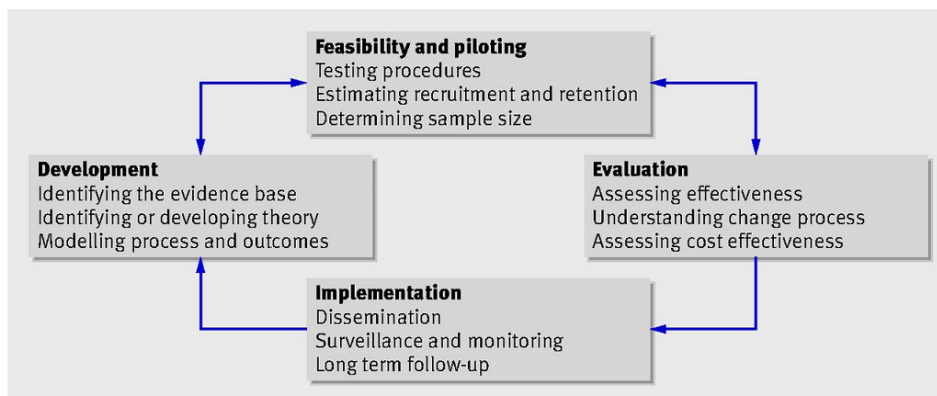

Figure 1

Figure 1

92x49mm (300 x 300 DPI)



1  
2  
3  
4  
5  
6  
7  
8  
9  
10  
11  
12  
13  
14  
15  
16  
17  
18  
19  
20  
21  
22  
23  
24  
25  
26  
27  
28  
29  
30  
31  
32  
33  
34  
35  
36  
37  
38  
39  
40  
41  
42  
43  
44  
45  
46  
47  
48  
49  
50  
51  
52  
53  
54  
55  
56  
57  
58  
59  
60



Figure 2 The intervention

Figure 2

338x190mm (300 x 300 DPI)

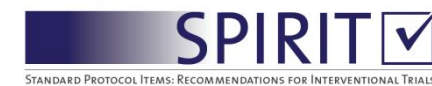

SPIRIT 2013 Checklist: Recommended items to address in a clinical trial protocol and related documents

| Section/item               | Item No | Description                                                                                                                                                                                                                                                                              | Answer (DiaPROM trial)                                                                    |
|----------------------------|---------|------------------------------------------------------------------------------------------------------------------------------------------------------------------------------------------------------------------------------------------------------------------------------------------|-------------------------------------------------------------------------------------------|
| Title                      | 1       | Descriptive title identifying the study design, population, interventions, and, if applicable, trial acronym                                                                                                                                                                             | The title identify design, population, the intervention (use of PROMs) and trial acronym. |
| Trial registration         | 2a      | Trial identifier and registry name. If not yet registered, name of intended registry                                                                                                                                                                                                     | Trial registration number is included (p. 2 and 15).                                      |
|                            | 2b      | All items from the World Health Organization Trial Registration Data Set                                                                                                                                                                                                                 | All items have been checked and relevant items are included in the protocol.              |
| Protocol version           | 3       | Date and version identifier                                                                                                                                                                                                                                                              | Version 25.10.2018                                                                        |
| Funding                    | 4       | Sources and types of financial, material, and other support                                                                                                                                                                                                                              | Funding statement is included in the paper (p. 18).                                       |
| Roles and responsibilities | 5a      | Names, affiliations, and roles of protocol contributors                                                                                                                                                                                                                                  | Included                                                                                  |
|                            | 5b      | Name and contact information for the trial sponsor                                                                                                                                                                                                                                       | Name of trial sponsor is included (p.18).                                                 |
|                            | 5c      | Role of study sponsor and funders, if any, in study design; collection, management, analysis, and interpretation of data; writing of the report; and the decision to submit the report for publication, including whether they will have ultimate authority over any of these activities | Included (page 15 and 18).                                                                |
|                            | 5d      | Composition, roles, and responsibilities of the coordinating centre, steering committee, endpoint adjudication committee, data management team, and other individuals or groups overseeing the trial, if applicable (see Item 21a for data monitoring committee)                         | N/A                                                                                       |
| <b>Introduction</b>        |         |                                                                                                                                                                                                                                                                                          |                                                                                           |
| Background and rationale   | 6a      | Description of research question and justification for undertaking the trial, including summary of relevant studies (published and unpublished) examining benefits and harms for each intervention                                                                                       | Described in the introduction section (p. 4-5) and aim section (p. 9-10) .                |

|                                                           |     |                                                                                                                                                                                                           |                                                                                                                                               |
|-----------------------------------------------------------|-----|-----------------------------------------------------------------------------------------------------------------------------------------------------------------------------------------------------------|-----------------------------------------------------------------------------------------------------------------------------------------------|
|                                                           | 6b  | Explanation for choice of comparators                                                                                                                                                                     | Described (p. 11-12)                                                                                                                          |
| Objectives                                                | 7   | Specific objectives or hypotheses                                                                                                                                                                         | An overarching aim of the DiaPROM trial are described (p. 5), and the aim of the present pilot RCT are described in the aim section (p. 9-10) |
| Trial design                                              | 8   | Description of trial design including type of trial (eg, parallel group, crossover, factorial, single group), allocation ratio, and framework (eg, superiority, equivalence, noninferiority, exploratory) | Described in the methods section (starts on p. 10)                                                                                            |
| <b>Methods: Participants, interventions, and outcomes</b> |     |                                                                                                                                                                                                           |                                                                                                                                               |
| Study setting                                             | 9   | Description of study settings (eg, community clinic, academic hospital) and list of countries where data will be collected. Reference to where list of study sites can be obtained                        | Study setting and participants for the pilot study are described in the methods section (starts on p. 10).                                    |
| Eligibility criteria                                      | 10  | Inclusion and exclusion criteria for participants. If applicable, eligibility criteria for study centres and individuals who will perform the interventions (eg, surgeons, psychotherapists)              | Described in the methods section (starts on p. 10).                                                                                           |
| Interventions                                             | 11a | Interventions for each group with sufficient detail to allow replication, including how and when they will be administered                                                                                | Described in the methods section (starts on p. 10).                                                                                           |
|                                                           | 11b | Criteria for discontinuing or modifying allocated interventions for a given trial participant (eg, drug dose change in response to harms, participant request, or improving/worsening disease)            | Described in the methods section (p. 13) and in the ethic section (p. 15-16).                                                                 |
|                                                           | 11c | Strategies to improve adherence to intervention protocols, and any procedures for monitoring adherence (eg, drug tablet return, laboratory tests)                                                         | N/A                                                                                                                                           |
|                                                           | 11d | Relevant concomitant care and interventions that are permitted or prohibited during the trial                                                                                                             | Described in the methods section (p. 10-13)                                                                                                   |

|                                                                     |     |                                                                                                                                                                                                                                                                                                                                                                                |                                                                                                                                                                                                                                                                                                                                                 |
|---------------------------------------------------------------------|-----|--------------------------------------------------------------------------------------------------------------------------------------------------------------------------------------------------------------------------------------------------------------------------------------------------------------------------------------------------------------------------------|-------------------------------------------------------------------------------------------------------------------------------------------------------------------------------------------------------------------------------------------------------------------------------------------------------------------------------------------------|
| Outcomes                                                            | 12  | Primary, secondary, and other outcomes, including the specific measurement variable (eg, systolic blood pressure), analysis metric (eg, change from baseline, final value, time to event), method of aggregation (eg, median, proportion), and time point for each outcome. Explanation of the clinical relevance of chosen efficacy and harm outcomes is strongly recommended | Primary and secondary outcomes for the forthcoming fully powered RCT are described (p. 5). The objectives for the present pilot RCT are described (p. 9-10), and the analyses of data (p. 14-15), time point for collecting outcome measures (p. 13-14), and explanations for clinical relevance of the DiaPROM trial (p. 4-5 and 16), as well. |
| Participant timeline                                                | 13  | Time schedule of enrolment, interventions (including any run-ins and washouts), assessments, and visits for participants. A schematic diagram is highly recommended (see Figure)                                                                                                                                                                                               | Described in the methods section (starts on p. 10). A figure describing the steps in the intervention is also included.                                                                                                                                                                                                                         |
| Sample size                                                         | 14  | Estimated number of participants needed to achieve study objectives and how it was determined, including clinical and statistical assumptions supporting any sample size calculations                                                                                                                                                                                          | The rationale for number of participants is described in the methods section (p. 10).                                                                                                                                                                                                                                                           |
| Recruitment                                                         | 15  | Strategies for achieving adequate participant enrolment to reach target sample size                                                                                                                                                                                                                                                                                            | Not relevant for a pilot study                                                                                                                                                                                                                                                                                                                  |
| <b>Methods: Assignment of interventions (for controlled trials)</b> |     |                                                                                                                                                                                                                                                                                                                                                                                |                                                                                                                                                                                                                                                                                                                                                 |
| Allocation:                                                         |     |                                                                                                                                                                                                                                                                                                                                                                                |                                                                                                                                                                                                                                                                                                                                                 |
| Sequence generation                                                 | 16a | Method of generating the allocation sequence (eg, computer-generated random numbers), and list of any factors for stratification. To reduce predictability of a random sequence, details of any planned restriction (eg, blocking) should be provided in a separate document that is unavailable to those who enrol participants or assign interventions                       | Included in the methods section (p. 11).                                                                                                                                                                                                                                                                                                        |
| Allocation concealment mechanism                                    | 16b | Mechanism of implementing the allocation sequence (eg, central telephone; sequentially numbered, opaque, sealed envelopes), describing any steps to conceal the sequence until interventions are assigned                                                                                                                                                                      | Described in the methods section (p. 11)                                                                                                                                                                                                                                                                                                        |
| Implementation                                                      | 16c | Who will generate the allocation sequence, who will enrol participants, and who will assign participants to interventions                                                                                                                                                                                                                                                      | Described in the methods section (p. 11)                                                                                                                                                                                                                                                                                                        |
| Blinding (masking)                                                  | 17a | Who will be blinded after assignment to interventions (eg, trial participants, care providers, outcome assessors, data analysts), and how                                                                                                                                                                                                                                      | Described in the methods section (p. 11).                                                                                                                                                                                                                                                                                                       |

|                                                           |     |                                                                                                                                                                                                                                                                                                                                                                                                              |                                                                                                                                                                      |
|-----------------------------------------------------------|-----|--------------------------------------------------------------------------------------------------------------------------------------------------------------------------------------------------------------------------------------------------------------------------------------------------------------------------------------------------------------------------------------------------------------|----------------------------------------------------------------------------------------------------------------------------------------------------------------------|
|                                                           | 17b | If blinded, circumstances under which unblinding is permissible, and procedure for revealing a participant's allocated intervention during the trial                                                                                                                                                                                                                                                         | The study is not blinded for the participants and the health care providers as stated (p. 11).                                                                       |
| <b>Methods: Data collection, management, and analysis</b> |     |                                                                                                                                                                                                                                                                                                                                                                                                              |                                                                                                                                                                      |
| Data collection methods                                   | 18a | Plans for assessment and collection of outcome, baseline, and other trial data, including any related processes to promote data quality (eg, duplicate measurements, training of assessors) and a description of study instruments (eg, questionnaires, laboratory tests) along with their reliability and validity, if known. Reference to where data collection forms can be found, if not in the protocol | Plans for assessments and included measures are described in the methods section (p. 13-14). References to the included instruments are given.                       |
|                                                           | 18b | Plans to promote participant retention and complete follow-up, including list of any outcome data to be collected for participants who discontinue or deviate from intervention protocols                                                                                                                                                                                                                    | The relevant information for a pilot RCT is described in the methods section (p. 10-14)                                                                              |
| Data management                                           | 19  | Plans for data entry, coding, security, and storage, including any related processes to promote data quality (eg, double data entry; range checks for data values). Reference to where details of data management procedures can be found, if not in the protocol                                                                                                                                            | Data storage is described (p. 15). Data entry is described (p. 14). Reference to where details of data management procedures can be found is described (p. 2 and 15) |
| Statistical methods                                       | 20a | Statistical methods for analysing primary and secondary outcomes. Reference to where other details of the statistical analysis plan can be found, if not in the protocol                                                                                                                                                                                                                                     | Statistical analysis plans for both quantitative and qualitative data are included (p. 14-15)                                                                        |
|                                                           | 20b | Methods for any additional analyses (eg, subgroup and adjusted analyses)                                                                                                                                                                                                                                                                                                                                     | N/A for a pilot study.                                                                                                                                               |
|                                                           | 20c | Definition of analysis population relating to protocol non-adherence (eg, as randomised analysis), and any statistical methods to handle missing data (eg, multiple imputation)                                                                                                                                                                                                                              | N/A for a pilot study.                                                                                                                                               |
| <b>Methods: Monitoring</b>                                |     |                                                                                                                                                                                                                                                                                                                                                                                                              |                                                                                                                                                                      |

|                                 |     |                                                                                                                                                                                                                                                                                                                                       |                                                               |
|---------------------------------|-----|---------------------------------------------------------------------------------------------------------------------------------------------------------------------------------------------------------------------------------------------------------------------------------------------------------------------------------------|---------------------------------------------------------------|
| Data monitoring                 | 21a | Composition of data monitoring committee (DMC); summary of its role and reporting structure; statement of whether it is independent from the sponsor and competing interests; and reference to where further details about its charter can be found, if not in the protocol. Alternatively, an explanation of why a DMC is not needed | None planned.                                                 |
|                                 | 21b | Description of any interim analyses and stopping guidelines, including who will have access to these interim results and make the final decision to terminate the trial                                                                                                                                                               | None planned.                                                 |
| Harms                           | 22  | Plans for collecting, assessing, reporting, and managing solicited and spontaneously reported adverse events and other unintended effects of trial interventions or trial conduct                                                                                                                                                     | Included in the ethics and dissemination section (p. 15-16).  |
| Auditing                        | 23  | Frequency and procedures for auditing trial conduct, if any, and whether the process will be independent from investigators and the sponsor                                                                                                                                                                                           | Not planned.                                                  |
| <b>Ethics and dissemination</b> |     |                                                                                                                                                                                                                                                                                                                                       |                                                               |
| Research ethics approval        | 24  | Plans for seeking research ethics committee/institutional review board (REC/IRB) approval                                                                                                                                                                                                                                             | Included (p.2 and 16).                                        |
| Protocol amendments             | 25  | Plans for communicating important protocol modifications (eg, changes to eligibility criteria, outcomes, analyses) to relevant parties (eg, investigators, REC/IRBs, trial participants, trial registries, journals, regulators)                                                                                                      | Described in the ethics and dissemination section (p. 15-16). |
| Consent or assent               | 26a | Who will obtain informed consent or assent from potential trial participants or authorised surrogates, and how (see Item 32)                                                                                                                                                                                                          | Described in the method section (starts on p. 10)             |
|                                 | 26b | Additional consent provisions for collection and use of participant data and biological specimens in ancillary studies, if applicable                                                                                                                                                                                                 | N/A                                                           |
| Confidentiality                 | 27  | How personal information about potential and enrolled participants will be collected, shared, and maintained in order to protect confidentiality before, during, and after the trial                                                                                                                                                  | Described in the ethics and dissemination section (p. 15-16). |

|                                  |                               |     |                                                                                                                                                                                                                                                                                     |                                                               |
|----------------------------------|-------------------------------|-----|-------------------------------------------------------------------------------------------------------------------------------------------------------------------------------------------------------------------------------------------------------------------------------------|---------------------------------------------------------------|
| 1<br>2<br>3<br>4                 | Declaration of interests      | 28  | Financial and other competing interests for principal investigators for the overall trial and each study site                                                                                                                                                                       | Included (p. 18)                                              |
| 5<br>6<br>7                      | Access to data                | 29  | Statement of who will have access to the final trial dataset, and disclosure of contractual agreements that limit such access for investigators                                                                                                                                     | Described in the ethics and dissemination section (p. 15-16). |
| 8<br>9<br>10                     | Ancillary and post-trial care | 30  | Provisions, if any, for ancillary and post-trial care, and for compensation to those who suffer harm from trial participation                                                                                                                                                       | N/A                                                           |
| 11<br>12<br>13<br>14<br>15<br>16 | Dissemination policy          | 31a | Plans for investigators and sponsor to communicate trial results to participants, healthcare professionals, the public, and other relevant groups (eg, via publication, reporting in results databases, or other data sharing arrangements), including any publication restrictions | Described in the ethics and dissemination section (p. 15-16). |
| 17<br>18<br>19                   |                               | 31b | Authorship eligibility guidelines and any intended use of professional writers                                                                                                                                                                                                      | N/A                                                           |
| 20<br>21<br>22                   |                               | 31c | Plans, if any, for granting public access to the full protocol, participant-level dataset, and statistical code                                                                                                                                                                     | N/A                                                           |
| 23<br>24                         | <b>Appendices</b>             |     |                                                                                                                                                                                                                                                                                     |                                                               |
| 25<br>26<br>27                   | Informed consent materials    | 32  | Model consent form and other related documentation given to participants and authorised surrogates                                                                                                                                                                                  | Not available in English.                                     |
| 28<br>29<br>30<br>31<br>32       | Biological specimens          | 33  | Plans for collection, laboratory evaluation, and storage of biological specimens for genetic or molecular analysis in the current trial and for future use in ancillary studies, if applicable                                                                                      | N/A                                                           |

33 \*It is strongly recommended that this checklist be read in conjunction with the SPIRIT 2013 Explanation & Elaboration for important clarification on the items. Amendments to the  
 34 protocol should be tracked and dated. The SPIRIT checklist is copyrighted by the SPIRIT Group under the Creative Commons "[Attribution-NonCommercial-NoDerivs 3.0 Unported](https://creativecommons.org/licenses/by-nc-nd/3.0/)"  
 35 license.  
 36  
 37  
 38  
 39  
 40  
 41  
 42

# BMJ Open

## The use of Patient-Reported Outcome Measures (PROMs) in clinical diabetes consultations: study protocol for the DiaPROM randomized controlled trial pilot study.

|                                 |                                                                                                                                                                                                                                                                                                                                                                                                                                                                                                                                                                                                                                                                           |
|---------------------------------|---------------------------------------------------------------------------------------------------------------------------------------------------------------------------------------------------------------------------------------------------------------------------------------------------------------------------------------------------------------------------------------------------------------------------------------------------------------------------------------------------------------------------------------------------------------------------------------------------------------------------------------------------------------------------|
| Journal:                        | <i>BMJ Open</i>                                                                                                                                                                                                                                                                                                                                                                                                                                                                                                                                                                                                                                                           |
| Manuscript ID                   | bmjopen-2018-024008.R2                                                                                                                                                                                                                                                                                                                                                                                                                                                                                                                                                                                                                                                    |
| Article Type:                   | Protocol                                                                                                                                                                                                                                                                                                                                                                                                                                                                                                                                                                                                                                                                  |
| Date Submitted by the Author:   | 28-Nov-2018                                                                                                                                                                                                                                                                                                                                                                                                                                                                                                                                                                                                                                                               |
| Complete List of Authors:       | Haugstvedt, Anne; Hogskulen pa Vestlandet, Department of Health and Caring Sciences<br>Hernar, Ingvild; Hogskulen pa Vestlandet, Department of Health and Caring Sciences; Univeristy of Bergen, Department of Global Public Health and Primary Care<br>Strandberg, Ragnhild ; Hogskulen pa Vestlandet, Department of Health and Caring Sciences<br>Richards, David; University of Exeter, Medical School<br>Nilsen, Roy; Hogskulen pa Vestlandet, Department of Health and Caring Sciences<br>Tell, Grethe; University of Bergen, Department of Global Public Health and Primary Care<br>Graue, Marit; Hogskulen pa Vestlandet, Department of Health and Caring Sciences |
| <b>Primary Subject Heading</b>: | Diabetes and endocrinology                                                                                                                                                                                                                                                                                                                                                                                                                                                                                                                                                                                                                                                |
| Secondary Subject Heading:      | Patient-centred medicine                                                                                                                                                                                                                                                                                                                                                                                                                                                                                                                                                                                                                                                  |
| Keywords:                       | General diabetes < DIABETES & ENDOCRINOLOGY, Quality in health care < HEALTH SERVICES ADMINISTRATION & MANAGEMENT, Protocols & guidelines < HEALTH SERVICES ADMINISTRATION & MANAGEMENT                                                                                                                                                                                                                                                                                                                                                                                                                                                                                   |
|                                 |                                                                                                                                                                                                                                                                                                                                                                                                                                                                                                                                                                                                                                                                           |

SCHOLARONE™  
Manuscripts



1  
2  
3  
4 The use of Patient-Reported Outcome Measures (PROMs) in  
5  
6  
7  
8 clinical diabetes consultations: study protocol for the  
9  
10  
11 DiaPROM randomized controlled trial pilot study.  
12  
13  
14

15 Anne Haugstvedt,<sup>1</sup> Ingvild Hernar,<sup>1,2,3</sup> Ragnhild B Strandberg,<sup>1</sup> David Richards,<sup>4</sup>

16  
17 Roy M Nilsen,<sup>1</sup> Grethe S Tell,<sup>2</sup> Marit Graue<sup>1</sup>

18  
19  
20  
21 <sup>1</sup>Department of Health and Caring Sciences, Western Norway University of Applied Sciences,  
22  
23 Bergen, Norway

24  
25  
26 <sup>2</sup>Department of Global Public Health and Primary Care, University of Bergen, Bergen,  
27  
28 Norway

29  
30  
31 <sup>3</sup>Department of Medicine, Haukeland University Hospital, Bergen, Norway

32  
33  
34 <sup>4</sup>Institute for Health Research, University of Exeter Medical School, Exeter, UK

35  
36  
37 Correspondence to: Anne Haugstvedt, Department of Health and Caring Sciences, Western  
38  
39 Norway University of Applied Sciences, Post Box 7030, N-5020 Bergen, Norway. Tel: +47  
40  
41 55 58 78 88; Mobile +47 47 82 92 20. E-mail: [ahau@hvl.no](mailto:ahau@hvl.no)

42  
43  
44  
45  
46 Word count in Abstract: 297

47  
48  
49  
50 Word count in main text: 4246  
51  
52  
53  
54  
55  
56  
57  
58  
59  
60

## ABSTRACT

**Introduction** Although diabetes distress is found to be associated with decreased glycaemic control among adults with type 1 diabetes, the psychological and emotional impact of living with the condition is often not recognized and often underreported in diabetes care. Therefore, regular assessment of diabetes distress is recommended. Assessment of diabetes distress using Patient-Reported Outcome Measures (PROMs) in clinical practice has the potential to enhance care for people with diabetes by identifying problems and improving patient-clinician communication. In this study protocol, we describe a pilot randomized controlled trial (RCT) aiming to test the feasibility of all components of an empowerment-based intervention using PROMs as dialogue support in clinical diabetes consultations, and to address the uncertainties associated with running a fully powered evaluation study.

**Methods and analysis** We will undertake a two arm pilot RCT of an intervention utilizing the Problem Areas In Diabetes scale (PAID) in clinical diabetes consultations in order to conclude whether a fully powered trial is appropriate and/or feasible. The study will also include qualitative in-depth interviews with participants and health care providers. Our objectives are to: 1) evaluate the recruitment procedures and attrition rates; 2) evaluate the performance of the randomization procedure; 3) evaluate the participants' mean scores on the outcome measures before and after the intervention; 4) evaluate if the intervention consultations are acceptable and feasible; and 5) explore patients' and health care providers experiences with the use of PAID as dialogue support and empowerment-based communication skills in clinical diabetes consultations. The quantitative data analysis includes descriptive statistics (frequencies, percentages, means, SD and CI). For the qualitative data, we will perform thematic analysis.

1  
2  
3 **Ethics and dissemination** Ethical approval has been obtained from the Western Norway  
4  
5 Regional Committee for Medical and Health Research Ethics (2017/1506/REC west). The  
6  
7 trial is registered in ClinicalTrials.gov (ID: NCT03471104).  
8  
9

10 **Keywords** Type 1 diabetes, Diabetes distress, Patient-Reported Outcome Measures  
11  
12 (PROMs), Complex intervention  
13  
14  
15  
16  
17  
18

### 19 **Strengths and limitations of the study**

20  
21

- 22 • This is a study with the potential to provide new knowledge about the use of Patient-  
23  
24 Reported Outcome Measures (PROMs) as dialogue support in clinical diabetes  
25  
26 consultations among patients with type 1 diabetes.  
27  
28
- 29 • The use of the Medical Research Council's framework as a guide for the development of  
30  
31 study intervention initiatives like this is a strength because the feasibility and uncertainties  
32  
33 related to a fully-powered RCT can be illuminated before a resource intensive fully  
34  
35 powered RCT is conducted.  
36  
37
- 38 • A key challenge includes possible contamination of the control group although the  
39  
40 completed PROMs will not be available in the electronic patient records (EPR) of the  
41  
42 participants in the control group.  
43  
44  
45  
46  
47  
48  
49  
50  
51  
52  
53  
54  
55  
56  
57  
58  
59  
60

## INTRODUCTION

The management of type 1 diabetes (T1D) is complex and people living with the condition need to make numerous daily choices related to their medical treatment.[1, 2] They need to monitor their blood glucose and administer insulin several times each day. The burden of living with T1D remains a challenge despite new insulin types and advances in insulin delivery and glucose monitoring technologies.[3] Many Norwegian adults with T1D do not achieve the recommended treatment goals for glycaemic control.[4, 5] This poor goal attainment might be due to inappropriate choice of insulin regimen for the individual, but research has also shown psychological and emotional aspects are important barriers to satisfactory diabetes self-management.[6]

The psychological and emotional impact of living with diabetes is often unrecognized and/or underreported in diabetes care.[7, 8] Diabetes distress, which reflects the emotional response to the burden, worries, anxieties, frustrations and stressors associated with managing diabetes in everyday life,[9, 10] is found to be associated with decreased glycaemic control.[11, 12] Therefore, regular assessment of diabetes distress is recommended.[13] Such assessment is considered feasible and beneficial to promote the recognition of psychological and emotional issues that affect diabetes self-management.[9, 14]

Collecting Patient-Reported Outcome Measures (PROMs) involves asking people to complete questionnaires concerning the impact of their condition and its treatment on their health.[15]

The integration of PROMs in clinical practice has the potential to improve care for people with diabetes and other chronic conditions by screening for and identifying problems, monitoring progress over time, improving patient-clinician communication and enabling people to become more involved in managing their own health.[16, 17] However, using

1  
2  
3 PROMs in itself may not affect health outcomes. The collection of PROMs should be  
4  
5 accompanied by a discussion of results to elaborate on any problems identified by the  
6  
7 assessment.[14, 17] Previous research has shown that the use of PROMs to monitor diabetes  
8  
9 psychological distress and general wellbeing followed by a discussion of outcomes improves  
10  
11 psychological wellbeing in both adults and youth with diabetes.[14, 18, 19] In the Cross-  
12  
13 National Diabetes Attitudes, Wishes, and Needs (DAWN) MIND study,[14] the skills used in  
14  
15 discussions of PROMs data regarding diabetes distress and wellbeing were based on  
16  
17 empowerment theory and patient-centred communication. Empowerment in nursing and  
18  
19 health care is defined as a motivational approach and process using specific counselling and  
20  
21 communication techniques to assist patients in making health-promoting behaviour  
22  
23 changes.[20] The approach is patient-centred with the health care providers facilitating and  
24  
25 providing information and knowledge to assist the patients in taking informed decisions. The  
26  
27 desired outcomes in the empowerment process are control and self-determination. A  
28  
29 systematic review by Chen & Li [21] states that interventions aiming to empower people with  
30  
31 chronic illnesses are able to improve health status, improve outcome indicators of  
32  
33 psychological and social aspects, and improve self-management. The authors of the DAWN  
34  
35 MIND study suggest further research on process evaluations to explore the role of  
36  
37 empowerment- and patient-centred skills such as active listening, use of open-ended  
38  
39 questions, and promoting active patient participation in the decision making process.[14]  
40  
41  
42  
43  
44  
45  
46

47 The overarching aim of the Diabetes Patient-Reported Outcome Measures trial  
48  
49 (DiaPROM trial) is to develop, test and evaluate a structured empowerment-based  
50  
51 intervention using PROMs regarding diabetes distress as dialogue support in clinical diabetes  
52  
53 consultations among adults with T1D. Our proposition is that the DiaPROM intervention  
54  
55 initiative will reduce diabetes distress and further improve overall wellbeing, improve  
56  
57 perceived competence for diabetes management and improve glycaemic control. Based on  
58  
59  
60

1  
2  
3 experiences and research,[14, 18, 19] we also believe that improved focus on the  
4  
5 psychological and emotional burden of the disease will improve satisfaction with diabetes  
6  
7 follow-up. This paper describes the protocol for a pilot randomized controlled trial (RCT) to  
8  
9 test the feasibility of and uncertainties associated with a fully powered evaluation study.  
10  
11

## 12 13 **The development of the DiaPROM trial**

14  
15  
16  
17 The DiaPROM trial is part of the implementation of PROMs in the Norwegian  
18  
19 Diabetes Register for Adults (NDR-A). We wanted to design a study to test a method for  
20  
21 utilizing the PROMs data in clinical diabetes practice. The study is multidisciplinary and  
22  
23 consists of several interacting components and a number of behaviours required by those  
24  
25 receiving and delivering the intervention. Thus, we consider the study as a complex  
26  
27 intervention with a need to develop and test the various components gradually before  
28  
29 conducting a fully powered RCT. As guidance in this process, we used the Medical Research  
30  
31 Council's framework (MRC framework) for the evaluation of complex interventions.[22, 23]  
32  
33 The framework describes four important phases in the development, evaluation and  
34  
35 implementation of a new intervention initiative: (1) the development phase, (2) the feasibility  
36  
37 and piloting phase, (3) the evaluation phase and (4) the implementation phase (figure 1).  
38  
39  
40  
41  
42

43 The development of the DiaPROM trial took place during 2016 and 2017. Initially,  
44  
45 the essential tasks were to determine which PROMs to include and how patients should  
46  
47 complete the PROMs.  
48  
49

### 50 51 *PROMs to include*

52  
53  
54 We reviewed the literature to identify published articles on the use of PROMs as  
55  
56 dialogue support in clinical diabetes practice. We wanted to identify the most common used  
57  
58 PROMs to measure diabetes distress. We recognized that studies have primarily used PROMs  
59  
60

1  
2  
3 to evaluate interventions' effects; relatively few publications have reported on the use of  
4  
5 PROMs in clinical diabetes care. We did identify, however, the DAWN MIND study that  
6  
7 tested the feasibility and impact of the computer-assisted "Monitoring of Individual Needs in  
8  
9 Diabetes" procedure aimed to improve recognition and management of the psychological  
10  
11 needs of patients with diabetes by implementing PROMs in routine diabetes care.[14, 24]  
12  
13 Regular assessment of psychological needs was implemented as part of the annual review in  
14  
15 diabetes clinics across eight countries. The assessment included among others diabetes  
16  
17 distress measured by the Problem Areas in Diabetes (PAID) scale. Accordingly, Schmitt *et*  
18  
19 *al.*[25] emphasize the necessity of a justified choice of measurement and recommend the use  
20  
21 of the PAID when the clinical purpose is to bear in mind a variety of emotional concerns  
22  
23 related to living with diabetes. Some other studies have reported PAID as an appropriate  
24  
25 instrument for use in clinical diabetes consultations, as well.[26-30] The scale may contribute  
26  
27 to improved communication by making the dialogue between health care providers and  
28  
29 patients more therapeutic and goal oriented.  
30  
31  
32  
33  
34

### 35 36 *Patient and public involvement*

37  
38  
39  
40 Involving health service users throughout all phases of a study is important to provide  
41  
42 insight into patients' perspectives and ensure that the research focuses on issues relevant for  
43  
44 the health service users and the public.[31, 32] Patient and public involvement (PPI) is also  
45  
46 useful in terms of shaping the research processes.[31] In this study, we used the GRIPP2 short  
47  
48 form as guidance for including and reporting PPI.[32] To include the voice of the health  
49  
50 service users throughout the study, two people with diabetes have been included in the  
51  
52 DiaPROM project group, both experienced with PPI and research. They will contribute to all  
53  
54 phases of the study. Furthermore, we have included additional people with diabetes to share  
55  
56  
57  
58  
59  
60

1  
2  
3 their views on the various phases of the study, recruited mainly from national and local  
4  
5 diabetes associations.  
6  
7

8  
9 A crucial question when we considered which PROMs to include in the study, was  
10  
11 what adult people with T1D perceived as the most important and relevant aspects to  
12  
13 emphasize in diabetes follow-up. Thus, in parallel with the literature review, we consulted the  
14  
15 health service users. In addition to the health service users in the project group, we met the  
16  
17 leader of the Norwegian Diabetes Association and a group of four representatives from the  
18  
19 local diabetes association (two with T1D and two parents of children with T1D where one had  
20  
21 type 2 diabetes herself). First, we used open question to the health service users to determine  
22  
23 which topics they perceived as important and relevant to include in a set of PROMs. After an  
24  
25 open discussion, we asked them to review several generic instruments (e.g. World Health  
26  
27 Organization's 5-item wellbeing index (WHO-5), RAND-12 Health Status Inventory (RAND-  
28  
29 12), Patient Activation Measure (PAM)) and diabetes-specific instruments (e.g. PAID,  
30  
31 Diabetes Distress Scale (DDS), Perceived Competence for Diabetes Scale (PCDS)). The user  
32  
33 representatives considered the advantages and shortcomings of using the 20 statements in  
34  
35 PAID as dialogue support in the intervention. They found the instrument relevant and suitable  
36  
37 to be used in the intervention.  
38  
39  
40  
41  
42  
43

#### 44 *The PAID*

45  
46  
47 Based on the literature review and in accordance with the input from the health service  
48  
49 users, we chose the PAID scale for use in the study intervention. The participants' PAID  
50  
51 scores will constitute the basis for the dialogue in the clinical consultations. The scale was  
52  
53 developed to gain insight into the breadth of emotional responses to living with diabetes, and  
54  
55 consists of 20 statements regarding diabetes distress (e.g. "feeling constantly concerned about  
56  
57 food and eating", "worrying about low blood sugar reactions").[33-35] The scores are on a 5-  
58  
59  
60



1  
2  
3 point Likert scale from 0 (not a problem) to 4 (serious problem). An item score of 3  
4  
5 (somewhat serious problem) or 4 (serious problem) indicates moderate to serious diabetes  
6  
7 distress related to the specific item. Scale scores are transformed to a 0-100 scale, with higher  
8  
9 scores indicating greater distress, and a PAID total score >40 suggests serious diabetes-related  
10  
11 distress. To identify both moderate and serious distress, we defined scores of concern as  
12  
13 PAID total scores  $\geq 30$  or single item scores of 3 or 4. The scale has been translated into  
14  
15 several languages, including Norwegian.[36]  
16  
17  
18  
19

### 20 *Method for completing PROMs*

21  
22  
23 The literature describes various methods for administration of PROMs such as paper-  
24  
25 based self-administration at home or in the clinic, interviews by telephone or personal  
26  
27 meetings, computer-assisted self-administration in the clinic or mail- or web-based  
28  
29 administration from patients' homes.[16, 17] Electronic PROMs collection is preferred since  
30  
31 the patients' responses can be transferred to the electronic patient records without scanning  
32  
33 paper forms or punching data.[17] In our study, we decided on computer-assisted  
34  
35 administration on a touchscreen computer in the outpatient clinic. Using this method has  
36  
37 advantages, such as efficient and simultaneous data entry and minor privacy challenges.  
38  
39  
40  
41  
42

### 43 *Feasibility study*

44  
45  
46 We conducted a feasibility study in 2017 to examine the technical and practical  
47  
48 feasibility of collecting PROMs on a touchscreen computer in the outpatient clinic, and  
49  
50 evaluate the participants' perceived understanding and relevance of the items in the PAID and  
51  
52 the included outcome measures. We also evaluated the acceptability of completing PROMs  
53  
54 annually. Field observations and comments from the participants provided data on the  
55  
56 technical and practical procedures. Sixty-nine individuals with T1D  $\geq 40$  years participated in  
57  
58  
59  
60

1  
2  
3 the study and 83% of them reported that, to a high or a very high degree, they would be  
4  
5 positive about an annual completion of PROMs. However, almost 20% of 137 invited patients  
6  
7 did not show up at the clinic (change of appointments, sick, no reason given), and most of the  
8  
9 invited ones did not go directly to the computer on arrival at the clinic as instructed in the  
10  
11 information sheet. Thus, we developed clearer information and procedures for the pilot study  
12  
13 to avoid loss of potential participants among those invited. Further analyses of the results  
14  
15 from the feasibility study are ongoing, and we plan to publish these in a separate article.  
16  
17  
18  
19

## 20 **Aim**

21  
22  
23 The purpose of the pilot RCT reported here is to test the feasibility of the proposed  
24  
25 DiaPROM trial components and address the uncertainties associated with running a fully  
26  
27 powered RCT, in order to conclude whether such a trial is appropriate and/or feasible. Our  
28  
29 objectives are to:  
30  
31

- 32 1. evaluate the recruitment procedures and attrition rates;
- 33 2. evaluate the performance of the randomization procedure;
- 34 3. evaluate the participants' mean scores on the outcome measures before and after the  
35  
36 intervention;
- 37 4. evaluate if the intervention consultations are acceptable and feasible; and
- 38 5. explore patients' and health care providers' experiences with the use of PAID as dialogue  
39  
40 support and empowerment-based communication skills in clinical diabetes  
41  
42 consultations.  
43  
44  
45  
46  
47  
48  
49  
50  
51

## 52 **METHODS AND ANALYSIS**

53  
54 We will undertake a two arm pilot RCT with embedded qualitative study on  
55  
56 participants' and health care providers' views of the DiaPROM intervention initiative. We  
57  
58  
59  
60

1  
2  
3 report our protocol here using the SPIRIT checklist ([http://www.spirit-statement.org/wp-](http://www.spirit-statement.org/wp-content/uploads/2013/01/SPIRIT-Checklist-download-8Jan13.pdf)  
4 [content/uploads/2013/01/SPIRIT-Checklist-download-8Jan13.pdf](http://www.spirit-statement.org/wp-content/uploads/2013/01/SPIRIT-Checklist-download-8Jan13.pdf)).  
5  
6  
7

## 8 **Participants and eligibility criteria**

9  
10  
11  
12 As recommended for pilot RCTs,[37] we will include 80 participants: 40 in the  
13 intervention group and 40 controls. Participants will have T1D for at least 1 year and be aged  
14  $\geq 18$  to  $< 40$  years. We will exclude people who are unable to read or complete the PROMs on  
15 the touchscreen computer. Furthermore, we will exclude pregnant woman, patients with  
16 known and recorded cognitive deficiency (e.g. Down's syndrome, Alzheimer), severe somatic  
17 comorbidity (e.g. end stage renal disease, severe heart failure, severe cancer), and/or a major  
18 psychiatric diagnosis (e.g. severe depression or bipolar disorder, schizophrenia) as diabetes  
19 distress is often neither ethical nor possible to discuss with these group of patients. Eligible  
20 participants will receive information and consent forms by regular mail before their annual  
21 diabetes consultation at the clinic. The information form will include information about the  
22 possibility to withdraw from the study at any time point without consequences.  
23  
24  
25  
26  
27  
28  
29  
30  
31  
32  
33  
34  
35  
36  
37  
38

## 39 **Randomization procedure and allocation concealment**

40  
41  
42 We will randomize eligible and consenting participants, using computer-generated  
43 block randomization at the patient level, stratified for gender, immediately after the  
44 participants have completed both the PAID and the self-reported outcome measures. When  
45 participants complete the measures on the touchscreen computer in the outpatient clinic, they  
46 will receive an individual four-character code. When the physician downloads the PROMs  
47 data using the code, a concealed computerized allocation will take place. Information about  
48 which group the person is allocated to will appear on the computer screen and the physician  
49  
50  
51  
52  
53  
54  
55  
56  
57  
58  
59  
60

1  
2  
3 will inform the participant immediately. It is not possible to blind either participants or health  
4  
5 care providers.  
6  
7

## 8 **Trial intervention**

9  
10  
11  
12 After participants have completed the PAID scale, physicians download the scores  
13  
14 into the participants' electronic patient record (EPR) as part of the annual consultation (figure  
15  
16 2). Physicians then review and discuss the PAID scores briefly with participants. Participants  
17  
18 with one or more single PAID item(s) score of 3 or 4 (somewhat serious or serious problem),  
19  
20 or PAID total score  $\geq 30$ , will be referred to additional diabetes nurse consultations.  
21  
22 Participants with lower scores will receive regular follow-up according to usual clinical  
23  
24 protocols.  
25  
26  
27  
28

29  
30 Additional nurse follow-up will consist of at least two consultations. The first will  
31  
32 take place within four weeks after randomization, and the second within a further three  
33  
34 months. After the second nurse consultation, the nurse and the participant will agree any  
35  
36 further follow-up until the next annual consultation with the physician. Diabetes nurses will  
37  
38 review PAID scores and discuss the reported problem areas and distress with participants by  
39  
40 following a communication manual based on key elements from empowerment theory and  
41  
42 self-determination theory, such as empathetic communication and autonomy support.[38-40]  
43  
44 These communication skills involve "active listening", "asking open questions",  
45  
46 "responding", "summing up" and "agreeing on goals and actions to take". Nurses will record  
47  
48 their work on participants' problem areas, goals and actions. The intervention will last for a  
49  
50 maximum of one year, until the next annual consultation.  
51  
52  
53  
54  
55  
56  
57  
58  
59  
60

## Control procedure

The control group will receive “care as usual” which does not include a structured focus on psychological and emotional diabetes distress. For most patients the annual consultation normally constitute “care as usual”. Although all participants will complete the PAID before randomization, for control participants the scores will not be accessible to clinicians in the EPR until the study is completed. For ethical reasons, we will not prevent physicians discussing psychological or emotional issues with participants in the control group if participants specifically raise such an issue. Unlike participants in the intervention group, such discussions will not be structured with reference to PAID data. We will identify to what extent such discussions have taken place by reviewing participants’ EPR.

## Training of health care providers

Before the study commences, we will have a one-hour meeting with the participating physicians, and they will be trained in how to download the PAID scores into the EPR and how to briefly discuss the scores in the annual consultations. Further, they will get both oral information and written instructions regarding the interpretation of the PAID scores including instructions on the criteria for referral of participants to extra follow-up by the diabetes nurses. Nurses will get both oral and written information and a 2 x 1 hour training in how to interpret scores and discuss the reported problem areas, how to follow the communication manual in the consultations, and how to agree upon goals and actions to take with the participants.

## Data collection and outcome measures

All participants (both intervention and control groups) will complete the outcome measures electronically before the annual consultation at baseline and after 12 months. After

1  
2  
3 the annual consultation, the participants will complete a paper-based questionnaire about their  
4 experience and satisfaction with the diabetes follow-up. We will evaluate the recruitment  
5 procedures and attrition rates by observing and monitoring number of eligible participants  
6 invited, number of invited people declining participation, number of people who attended the  
7 clinic, number of intervention participants attended the nurse consultations, and number of  
8 consultations conducted. We will also observe and document the technical performance of the  
9 randomization procedure. Finally, we will document all types of contacts between participants  
10 and the diabetes outpatient clinic for all participants throughout the study period.  
11  
12  
13  
14  
15  
16  
17  
18  
19  
20  
21

22 To describe the study sample and evaluate the technical procedure of data retrieval  
23 from EPR, we will perform a computerized retrieval of the following variables from the  
24 participants' EPR: sex, age, ethnicity, body mass index, diabetes duration, HbA<sub>1c</sub> (secondary  
25 outcome), insulin regimen, insulin doses, severe hypoglycaemic episodes needing assistance  
26 in the past year, hospitalizations, co-morbidities and diabetes late complications.  
27  
28  
29  
30  
31  
32  
33  
34

35 The outcome measures to evaluate the effect of the intervention in the evaluation  
36 phase of the study (phase 3), were chosen based on a literature review and considerations  
37 among the researchers and the health service users. We decided upon the DDS as primary  
38 outcome. DDS measures diabetes distress and contains 17 items and 4 subscales: emotional  
39 burden (5 items), physician-related distress (4 items), regimen distress (5 items) and diabetes-  
40 related interpersonal distress (3 items).[41] The scores are on a 6-point Likert scale from 1  
41 (not a problem) to 6 (serious problem) with mean total or subscale score from 1 to 6.[42]  
42 Total or subscale scores >3 are defined as high levels of distress. The DDS has previously  
43 shown satisfactory psychometric properties to map diabetes distress, and might have  
44 advantages for use as outcome measure in clinical trials because it contributes to identify sub-  
45 domains of distress.[11, 25, 36] To measure the secondary outcomes, overall wellbeing and  
46  
47  
48  
49  
50  
51  
52  
53  
54  
55  
56  
57  
58  
59  
60

1  
2  
3 perceived diabetes competence, we have included the WHO-5[43-45] and the PCDS.[46-48]  
4  
5 We will use HbA1c as the target for glycaemic control.  
6  
7

8  
9 We will invite all participants from the intervention group and all health care  
10 providers (physicians and diabetes nurses) participating in the intervention group to individual  
11 in-depth interviews to collect qualitative data on their experiences with the intervention,  
12 including the use of PAID as dialogue support in clinical consultations. This will provide a  
13 sample of about 15-20 participants and 10-15 health care providers. All interviews will be  
14 conducted at the outpatient clinic, and will be audio recorded after obtaining consent from  
15 participants.  
16  
17  
18  
19  
20  
21  
22  
23  
24  
25

## 26 **Data analysis**

27  
28  
29 We will use Stata SE 15 for Windows for all statistical analyses,[49] and for data entry  
30 range checks for data values will be performed. We will report the recruitment of participants  
31 and the number of trial dropouts descriptively (frequencies and percentages). Further, we will  
32 report the means, SD and CI of the DDS and the other outcome measurements before and  
33 after the intervention period for both the intervention and control groups. As the study is a  
34 pilot and the sample size is small, we will not perform inferential statistics and analyze  
35 between group calculations. The participants' PAID scores will be analyzed descriptively  
36 (mean, SD), as well.  
37  
38  
39  
40  
41  
42  
43  
44  
45  
46  
47  
48

49 We will transcribe verbatim and analyse participants' and health care providers'  
50 experiences with the intervention, by using thematic analysis.[50] Thematic analysis is a  
51 flexible qualitative method without any specific theoretical foundation and consists of six  
52 steps: 1) transcribing, reading and re-reading, 2) generating initial codes, 3) searching for  
53 themes, 4) reviewing themes, 5) defining and naming the themes, and 6) producing the report.  
54  
55  
56  
57  
58  
59  
60

## ETHICS AND DISSEMINATION

The Norwegian Regional Committee for Medical and Health Research Ethics has approved the study (2017/1506/REK west). Haukeland University Hospital, Bergen, Norway is the responsible research institution (trial sponsor) where the study data will be stored on a secure research server. In order to protect confidentiality, names of the potential and enrolled participants will be stored separate from the other study data. Only the principle investigator and other clearly identified members of the project group have access to the study data. If important protocol modifications happen, this will be communicated to the ethic committee and ClinicalTrials.gov. Further information can be obtained from ClinicalTrials.gov, registration number NCT03471104.

Completing the PROMs may activate latent psychological or psychosocial problems and negative feelings. To care for any participants in the control group reporting worryingly high levels of distress (e.g. above cut points for severe levels of distress measured by PAID and/or DDS), the research team will continuously review the reported distress levels. We will discuss potential needs for more intensive care or referral to psychological or psychiatric follow-up for those reporting worryingly levels of distress with the physicians and diabetes nurses.

We will present the findings of the study phases at national and international conferences and submit manuscripts to peer-reviewed journals and popular science journals. Further, we will also publish the findings in popular science journals, public newspapers and journals for relevant user groups. One of the health service users will participate in the writing and publication process.



## DISCUSSION

In the pilot RCT study described in this protocol, we aim to test the feasibility of, and address the clinical and methodological uncertainties associated with running a fully powered RCT testing the effect of an intervention incorporating the use of PAID to decrease diabetes distress among people with T1D. The study will provide knowledge on the use of PAID in clinical diabetes practice, although the purpose primarily is to prepare the ground for the design and conduct of a full powered RCT. In addition, the qualitative evaluation will provide important knowledge on the specific empowerment-based communication skills used to discuss PAID scores of concern in the clinical consultations. In an upcoming fully powered evaluation study (phase 3) we plan to test the effect of the entire intervention package including both the use of PAID and the empowerment-based follow-up. A major limitation of such an effect study is the lack of information on how specific parts of the intervention may affect the results.

Diabetes distress has been shown to be a barrier for satisfactory glycaemic control, [11, 12] and a more structured focus on diabetes distress, may have the potential to improve long-term health for people with T1D by reducing the distress and improving glycaemic control. A previous literature review by Carlsen *et al.* [51] found that the use of PAID could benefit patients but emphasized the need for follow-up studies to evaluate whether the PAID should be implemented in routine diabetes care to enhance a more structured focus on diabetes distress.

The choice of utilizing PAID as dialogue support in the intervention and the DDS as the primary outcome measure is in accordance with previous research. Both instruments have previously shown satisfactory psychometric properties to map individual levels of diabetes

1  
2  
3 distress, but it has been claimed that the PAID has advantages for use in clinical practice and  
4  
5 that the DDS have advantages for use in clinical trials, because it also contributes to  
6  
7 identifying sub-domains of distress.[11, 25, 36] However, there will be an overlap between  
8  
9 the intervention measure (PAID) and the primary outcome measure (DDS) in this study.  
10  
11 Using PAID in the intervention may prime the participants' responses to the DDS, but the  
12  
13 inclusion of WHO-5 and the PCDS as additional outcomes may compensate for the overlap  
14  
15 between PAID and DDS. Previous research has shown links between diabetes distress  
16  
17 measured by PAID, and wellbeing and perceived competence. Snoek *et al.*[14] indicated an  
18  
19 overlap between predictors for diabetes distress and general wellbeing measured by WHO-5,  
20  
21 and Mohn *et al.*[48] showed an association between greater diabetes distress and lower  
22  
23 perceived competence for diabetes self-management measured by PCDS.  
24  
25  
26  
27  
28  
29

### 30 **Strengths and limitations**

31  
32 The use of the MRC framework is a strength in the development of this study, because  
33  
34 it includes several complex and interacting components that need to be considered and tested  
35  
36 with the purpose to reveal uncertainties before conducting a fully powered RCT. In addition,  
37  
38 the use of the GRIPP2 short form to guide the PPI throughout all phases of the development  
39  
40 of the intervention initiative is considered a strength. The health service users included in the  
41  
42 project have influenced among others the choice of PROMs, the choice of the theoretical  
43  
44 foundation for the intervention, and the discussions related to the qualitative component of the  
45  
46 study.  
47  
48  
49

50  
51 We have included primarily disease-specific outcome measures, but also one generic  
52  
53 PROM (WHO-5). Disease-specific PROMs are used to capture information that is most  
54  
55 pertinent to particular patient groups, but they might miss domains affecting the patient that  
56  
57 are unrelated to their disease.[16, 52] Generic instruments may capture broad dimensions of  
58  
59  
60

1  
2  
3 health and allow for comparisons between populations but might not be sensitive to changes  
4  
5 in disease-specific health domains over time or in relation to interventions.[15]  
6  
7

8  
9 The fact that the control group in the study will also complete the PAID and the  
10  
11 evaluation PROMs before the annual diabetes consultation, and that the same physicians meet  
12  
13 participants from both the intervention and the control groups might lead to intervention  
14  
15 contamination challenges. This might be a challenge although the scores will not be  
16  
17 accessible in the electronic patient records of participants in the control group.  
18  
19

## 20 21 **Acknowledgements** 22 23

24  
25  
26 Thanks to the Norwegian Nurses Association, the Norwegian Diabetes Association  
27  
28 and Western Norway University of Applied Sciences for funding the study. Thanks also to the  
29  
30 Norwegian Diabetes Register for Adults and DIPS AS for fruitful collaboration. Further, we  
31  
32 thank all the health care providers and the health care service user representatives involved in  
33  
34 the study. Thanks also to senior research fellow Peter Craig for giving us the permission to  
35  
36 reproduce the figure describing the study phases in the development of a complex  
37  
38 intervention.  
39  
40  
41

## 42 43 **Contributors** 44 45

46  
47 AH and MG applied for funding of the trial. AH, IH, MG and RBS designed the study  
48  
49 with involvement of GST, DR and RMN. AH wrote the first draft of the study protocol. All  
50  
51 other authors have edited and critically reviewed the manuscript, and all authors read and  
52  
53 approved the final version.  
54  
55  
56  
57  
58  
59  
60

## Funding

The study is funded by the Norwegian Nurse Association, Western Norway University of Applied Sciences, the Norwegian Diabetes Association and the Norwegian Diabetes Register for Adults. The first two funded a postdoctoral position and a PhD position, respectively. The last two contributed with running funds.

## Competing interests

None declared.

## Patient consent

There is no patient data included in this report.

## REFERENCES

1. American Association of Diabetes Educators (AADE). AADE7 Self-Care Behaviors. *Diabetes Educ* 2008;34:445-9.
2. American Diabetes Association (ADA). Introduction: standards of medical care in diabetes. *Diabetes Care* 2018;41(Suppl 1):1-2. Available from: <https://doi.org/10.2337/dc18-Sint01> (Accessed Jan 22, 2018).
3. Jones A, Vallis M, Pouwer F. If it does not significantly change HbA 1c levels why should we waste time on it? A plea for the prioritization of psychological well-being in people with diabetes. *Diabet Med* 2015;32:155-63.

- 1  
2  
3 4. Cooper JG, Claudi T, Thordarson HB, *et al.* Treatment of type 1 diabetes in the  
4  
5 specialist health service-data from the Norwegian Diabetes Register for Adults. *J*  
6  
7 *Norwegian Med Assoc* 2013;133:2257.  
8  
9
- 10 5. Carlsen S, Skrivarhaug T, Thue G, Cooper JG, Goransson L, Lovaas K, *et al.*  
11  
12 Glycemic control and complications in patients with type 1 diabetes - a registry-based  
13  
14 longitudinal study of adolescents and young adults. *Pediatr Diabetes* 2017;18:188-95.  
15  
16
- 17 6. Pouwer F, Nefs G, Nouwen A. Adverse effects of depression on glycemic control and  
18  
19 health outcomes in people with diabetes: a review. *Endocrinol Metab Clin North Am*  
20  
21 2013;42:529-44.  
22  
23
- 24 7. Pouwer F, Beekman ATF, Lubach C, *et al.* Nurses' recognition and registration of  
25  
26 depression, anxiety and diabetes-specific emotional problems in outpatients with  
27  
28 diabetes mellitus. *Patient Educ Couns* 2006;60:235-40.  
29  
30
- 31 8. Peyrot M, Rubin RR, Lauritzen T, *et al.* Psychosocial problems and barriers to  
32  
33 improved diabetes management: results of the Cross-National Diabetes Attitudes,  
34  
35 Wishes and Needs (DAWN) Study. *Diabet Med* 2005;22:1379-85.  
36  
37
- 38 9. Fisher L, Gonzalez JS, Polonsky WH. The confusing tale of depression and distress in  
39  
40 patients with diabetes: a call for greater clarity and precision. *Diabet Med*  
41  
42 2014;31:764-72.  
43  
44
- 45 10. Snoek FJ, Bremmer MA, Hermanns N. Constructs of depression and distress in  
46  
47 diabetes: time for an appraisal. *Lancet Diabetes Endocrinol* 2015;3:450-60.  
48  
49
- 50 11. Strandberg RB, Graue M, Wentzel-Larsen T, *et al.* Longitudinal relationship between  
51  
52 diabetes-specific emotional distress and follow-up HbA<sub>1c</sub> in adults with Type 1  
53  
54 diabetes mellitus. *Diabet Med* 2015;32:1304-10.  
55  
56  
57  
58  
59  
60

12. Fisher L, Hessler D, Polonsky W, *et al.* Diabetes distress in adults with type 1 diabetes: Prevalence, incidence and change over time. *J Diabetes Complications* 2016;30:1123-8.
13. International Diabetes Federation. *International Diabetes Federation Diabetes Atlas* [Online]. 8th ed. International Diabetes Federation; 2017. Available from: <http://www.diabetesatlas.org/resources/2017-atlas.html> (accessed Jan 15, 2018).
14. Snoek FJ, Kersch NY, Eldrup E, *et al.* Monitoring of Individual Needs in Diabetes (MIND)-2: follow-up data from the cross-national Diabetes Attitudes, Wishes, and Needs (DAWN) MIND study. *Diabetes Care* 2012;35:2128-32.
15. Greenhalgh J, Dalkin S, Gooding K, *et al.* Functionality and feedback: a realist synthesis of the collation, interpretation and utilisation of patient-reported outcome measures data to improve patient care. *Health Serv Deliv Res* 2017;5.2.
16. Snyder CF, Aaronson NK, Choucair AK, *et al.* Implementing patient-reported outcomes assessment in clinical practice: a review of the options and considerations. *Qual Life Res* 2012;21:1305-14.
17. Eton DT, Beebe TJ, Hagen PT, Halyard MY, Montori VM, Naessens JM, Sloan JA, Thompson CA, Wood DL. Harmonizing and consolidating the measurement of patient-reported information at health care institutions: a position statement of the Mayo Clinic. *Patient Related Outcome Measures*. 2014;5:7-15. doi: 10.2147/PROM.S55069.
18. Pouwer F, Snoek FJ, van der Ploeg HM, Adèr HJ, Heine RJ, Monitoring of psychological well-being in outpatients with diabetes: effects on mood, HbA(1c), and the patient's evaluation of the quality of diabetes care: a randomized controlled trial. *Diabetes Care* 2001;24:1929-1935.

19. de Wit M, Delemarre-van de Waal HA, Bokma JA, *et al.* Monitoring and discussing health-related quality of life in adolescents with type 1 diabetes improve psychosocial well-being: a randomized controlled trial. *Diabetes Care* 2008;31:1521-1526.
20. Ellis-Stoll CC, Popkess-Vawter S. A concept analysis on the process of empowerment. *Advances in Nursing Science* 1998;21(2):62-68.
21. Chen YC, Li IC. Effectiveness of interventions using empowerment concept for patients with chronic disease: a systematic review. *JBI library of systematic reviews* 2009;7 (27):1179.
22. Craig P, Dieppe P, Macintyre S, *et al.* Developing and evaluating complex interventions: the new Medical Research Council guidance. *BMJ* 2008;337:979-83.
23. Craig, P. Developing and evaluating complex interventions: reflections on the 2008 MRC guidance. *Int J Nurs Stud* 2013;50:585-92.
24. Snoek, FJ, Kersch NY, Eldrup E, *et al.* Monitoring of Individual Needs in Diabetes (MIND): baseline data from the cross-national Diabetes Attitudes, Wishes, and Needs (DAWN) MIND study. *Diabetes Care* 2011;34:601-3.
25. Schmitt A, Reimer A, Kulzer B, *et al.* How to assess diabetes distress: comparison of the Problem Areas in Diabetes Scale (PAID) and the Diabetes Distress Scale (DDS). *Diabet Med* 2016;33:835-43.
26. Chawla A, Saha C, Marrero DG. A novel application of the problem areas in diabetes (PAID) instrument to improve glycemic control and patient satisfaction. *Diabetes Educ* 2010;36:337-44.

- 1  
2  
3 27. van Bastelaar KMP, Pouwer F, Geelhoed-Duijvestijn PHLM, *et al.* Diabetes-specific  
4 emotional distress mediates the association between depressive symptoms and  
5 glycemic control in type 1 and type 2 diabetes. *Diabet Med* 2010;27:798-803.  
6  
7
- 8  
9  
10 28. Meeuwissen JAC, Hollemann GJM, de Jong FJ, *et al.* Screening and guided self-help  
11 intervention for anxiety and depression in patients with type 2 diabetes. A new role for  
12 diabetes nurses in primary care? *Eur Diabetes Nurs* 2011;8:47-52.  
13  
14
- 15 29. Fler J, Tovote KA, Keers JC, *et al.* Screening for depression and diabetes-related  
16 distress in a diabetes outpatient clinic. *Diabet Med* 2013;30:88-94.  
17  
18
- 19 30. Reddy J, Wilhelm K, Campell L. Putting PAID to diabetes-related distress: the  
20 potential utility of the problem areas in diabetes (PAID) scale in patients with diabetes.  
21 *Psychosomatics* 2013;54:44-51.  
22  
23
- 24 31. Staley K. 'Is it worth doing?' Measuring the impact of patient and public involvement  
25 in research. *Res Involv Engagem* 2015; 1:6.  
26  
27
- 28 32. Staniszewska S, Brett J, Simera I, *et al.* GRIPP2 reporting checklists: tools to improve  
29 patient and public involvement in research. *BMJ* 2017;358:j3453.  
30  
31
- 32 33. Polonsky WH, Anderson BJ, Lohrer PA, *et al.* Assessment of diabetes-related distress.  
33 *Diabetes Care* 1995;18:754-60.  
34  
35
- 36 34. Welch GW, Jacobson AM, Polonsky WH. The Problem Areas in Diabetes scale: an  
37 evaluation of its clinical utility. *Diabetes Care* 1997;20:760-6.  
38  
39
- 40 35. Welch G, Weinger K, Anderson B, *et al.* Responsiveness of the Problem Areas in  
41 Diabetes (PAID) questionnaire. *Diabet Med* 2003;20:69-72.  
42  
43
- 44 36. Graue M, Haugstvedt A, Wentzel-Larsen T, *et al.* Diabetes-related emotional distress  
45 in adults: reliability and validity of the Norwegian versions of the Problem Areas in  
46  
47  
48  
49  
50  
51  
52  
53  
54  
55  
56  
57  
58  
59  
60



- 1  
2  
3 Diabetes Scale (PAID) and the Diabetes Distress Scale (DDS). *Int J Nurs Stud*  
4  
5 2011;49:174-182.  
6  
7  
8 37. Richards DA, Hallberg IR. Section 2. Investigating feasibility and undertaking pilot  
9 testing of complex interventions. *Complex Interventions in Health. An Overview of*  
10  
11 *Research Methods*. Routledge; 2015:121-82.  
12  
13  
14  
15 38. Anderson RM, Funnell M. *The Art of Empowerment: Stories and Strategies for*  
16  
17 *Diabetes Educators*. Alexandria, Virginia: American Diabetes Association; 2000.  
18  
19  
20  
21 39. Deci EL, Ryan RM. *Handbook of Self-determination Research*. Rochester, NY:  
22  
23 University of Rochester Press; 2002.  
24  
25  
26 40. Zoffmann V, Hörnsten Å, Storbækken S, *et al*. Translating person-centered care into  
27  
28 practice: a comparative analysis of motivational interviewing, illness-integration  
29 support, and guided self-determination. *Patient Educ Couns* 2016;99:400-7.  
30  
31  
32  
33 41. Polonsky WH, Fisher L, Psyd JE, *et al*. Assessing psychosocial distress in diabetes –  
34  
35 development of the Diabetes Distress Scale. *Diabetes Care* 2005;28:626-31.  
36  
37  
38  
39 42. Fisher L, Hessler D, Glasgow RE, *et al*. REDEEM: a pragmatic trial to reduce diabetes  
40  
41 distress. *Diabetes Care* 2013;36:2551-8.  
42  
43  
44 43. de Wit M, Pouwer F, Gemke RBJ, *et al*. Validation of the WHO-5 Well-Being Index  
45  
46 in adolescents with type 1 diabetes. *Diabetes Care* 2007;30:2003-6.  
47  
48  
49 44. Hajos TR, Pouwer F, Skovlund SE, *et al*. Psychometric and screening properties of the  
50  
51 WHO-5 well-being index in adult outpatients with Type 1 or Type 2 diabetes mellitus.  
52  
53 *Diabet Med* 2013;30:e63-9.  
54  
55  
56 45. Topp CW, Østergaard SD, Søndergaard S, *et al*. The WHO-5 Well-Being Index: a  
57  
58 systematic review of the literature. *Psychother Psychosom* 2015;84:167-76.  
59  
60

- 1  
2  
3 46. Williams GC, McGregor HA, Zeldman A, et al. Testing a self-determination theory  
4 process model for promoting glycemic control through diabetes self-management.  
5  
6 *Health Psychol* 2004;23:58-66.  
7  
8  
9  
10 47. Williams GC, McGregor HA, King D, et al. Variation in perceived competence,  
11 glycemic control, and patient satisfaction: relationship to autonomy support from  
12 physicians. *Patient Educ Couns* 2005;57:39-45.  
13  
14  
15  
16  
17 48. Mohn J, Graue M, Assmus J, et al. Self-reported diabetes self-management  
18 competence and support from healthcare providers in achieving autonomy are  
19 negatively associated with diabetes distress in adults with type 1 diabetes. *Diabet Med*  
20 2015;32:1513-19.  
21  
22  
23  
24  
25  
26  
27 49. StataCorp LLC. STATA Data Analysis and Statistical Software. Stata SE 15 ed.  
28 College Station, Texas, USA: StataCorp LLC; 2018.  
29  
30  
31  
32 50. Braun V, Clark V. Using thematic analysis in psychology. *Qual Res Psychol*  
33 2008;3:77-101.  
34  
35  
36  
37 51. Carlsen K, Haugstvedt A, Graue M. [PAID as screening and working tool in clinical  
38 consultations]. *Norwegian J Clin Nurs* 2015;10:228-37 [in Norwegian].  
39  
40  
41  
42 52. Black N, Burke L, Forrest CB, et al. Patient-reported outcomes: pathways to better  
43 health, better services, and better societies. *Qual Life Res* 2016;25:1103-12.  
44  
45  
46  
47  
48  
49  
50  
51  
52  
53  
54  
55  
56  
57  
58  
59  
60

1  
2  
3 **Figure 1.** Key elements in the Medical Research Council’s guidance for developing,  
4  
5 evaluating and implementing complex interventions (MRC framework). Reproduced  
6  
7 from Craig *et al.*[17] with permission.  
8  
9

10  
11 **Figure 2.** The study intervention in the DiaPROM trial.  
12  
13  
14  
15  
16  
17  
18  
19  
20  
21  
22  
23  
24  
25  
26  
27  
28  
29  
30  
31  
32  
33  
34  
35  
36  
37  
38  
39  
40  
41  
42  
43  
44  
45  
46  
47  
48  
49  
50  
51  
52  
53  
54  
55  
56  
57  
58  
59  
60

For peer review only



Figure 1

Figure 1

92x49mm (300 x 300 DPI)

1  
2  
3  
4  
5  
6  
7  
8  
9  
10  
11  
12  
13  
14  
15  
16  
17  
18  
19  
20  
21  
22  
23  
24  
25  
26  
27  
28  
29  
30  
31  
32  
33  
34  
35  
36  
37  
38  
39  
40  
41  
42  
43  
44  
45  
46  
47  
48  
49  
50  
51  
52  
53  
54  
55  
56  
57  
58  
59  
60



Figure 2 The intervention

Figure 2

338x190mm (300 x 300 DPI)



SPIRIT 2013 Checklist: Recommended items to address in a clinical trial protocol and related documents

| Section/item               | Item No | Description                                                                                                                                                                                                                                                                              | Answer (DiaPROM trial)                                                                    |
|----------------------------|---------|------------------------------------------------------------------------------------------------------------------------------------------------------------------------------------------------------------------------------------------------------------------------------------------|-------------------------------------------------------------------------------------------|
| Title                      | 1       | Descriptive title identifying the study design, population, interventions, and, if applicable, trial acronym                                                                                                                                                                             | The title identify design, population, the intervention (use of PROMs) and trial acronym. |
| Trial registration         | 2a      | Trial identifier and registry name. If not yet registered, name of intended registry                                                                                                                                                                                                     | Trial registration number is included (p. 2 and 15).                                      |
|                            | 2b      | All items from the World Health Organization Trial Registration Data Set                                                                                                                                                                                                                 | All items have been checked and relevant items are included in the protocol.              |
| Protocol version           | 3       | Date and version identifier                                                                                                                                                                                                                                                              | Version 25.10.2018                                                                        |
| Funding                    | 4       | Sources and types of financial, material, and other support                                                                                                                                                                                                                              | Funding statement is included in the paper (p. 18).                                       |
| Roles and responsibilities | 5a      | Names, affiliations, and roles of protocol contributors                                                                                                                                                                                                                                  | Included                                                                                  |
|                            | 5b      | Name and contact information for the trial sponsor                                                                                                                                                                                                                                       | Name of trial sponsor is included (p.18).                                                 |
|                            | 5c      | Role of study sponsor and funders, if any, in study design; collection, management, analysis, and interpretation of data; writing of the report; and the decision to submit the report for publication, including whether they will have ultimate authority over any of these activities | Included (page 15 and 18).                                                                |
|                            | 5d      | Composition, roles, and responsibilities of the coordinating centre, steering committee, endpoint adjudication committee, data management team, and other individuals or groups overseeing the trial, if applicable (see Item 21a for data monitoring committee)                         | N/A                                                                                       |
| <b>Introduction</b>        |         |                                                                                                                                                                                                                                                                                          |                                                                                           |
| Background and rationale   | 6a      | Description of research question and justification for undertaking the trial, including summary of relevant studies (published and unpublished) examining benefits and harms for each intervention                                                                                       | Described in the introduction section (p. 4-5) and aim section (p. 9-10) .                |

|                                                           |     |                                                                                                                                                                                                           |                                                                                                                                               |
|-----------------------------------------------------------|-----|-----------------------------------------------------------------------------------------------------------------------------------------------------------------------------------------------------------|-----------------------------------------------------------------------------------------------------------------------------------------------|
|                                                           | 6b  | Explanation for choice of comparators                                                                                                                                                                     | Described (p. 11-12)                                                                                                                          |
| Objectives                                                | 7   | Specific objectives or hypotheses                                                                                                                                                                         | An overarching aim of the DiaPROM trial are described (p. 5), and the aim of the present pilot RCT are described in the aim section (p. 9-10) |
| Trial design                                              | 8   | Description of trial design including type of trial (eg, parallel group, crossover, factorial, single group), allocation ratio, and framework (eg, superiority, equivalence, noninferiority, exploratory) | Described in the methods section (starts on p. 10)                                                                                            |
| <b>Methods: Participants, interventions, and outcomes</b> |     |                                                                                                                                                                                                           |                                                                                                                                               |
| Study setting                                             | 9   | Description of study settings (eg, community clinic, academic hospital) and list of countries where data will be collected. Reference to where list of study sites can be obtained                        | Study setting and participants for the pilot study are described in the methods section (starts on p. 10).                                    |
| Eligibility criteria                                      | 10  | Inclusion and exclusion criteria for participants. If applicable, eligibility criteria for study centres and individuals who will perform the interventions (eg, surgeons, psychotherapists)              | Described in the methods section (starts on p. 10).                                                                                           |
| Interventions                                             | 11a | Interventions for each group with sufficient detail to allow replication, including how and when they will be administered                                                                                | Described in the methods section (starts on p. 10).                                                                                           |
|                                                           | 11b | Criteria for discontinuing or modifying allocated interventions for a given trial participant (eg, drug dose change in response to harms, participant request, or improving/worsening disease)            | Described in the methods section (p. 13) and in the ethic section (p. 15-16).                                                                 |
|                                                           | 11c | Strategies to improve adherence to intervention protocols, and any procedures for monitoring adherence (eg, drug tablet return, laboratory tests)                                                         | N/A                                                                                                                                           |
|                                                           | 11d | Relevant concomitant care and interventions that are permitted or prohibited during the trial                                                                                                             | Described in the methods section (p. 10-13)                                                                                                   |

|                                                                     |     |                                                                                                                                                                                                                                                                                                                                                                                |                                                                                                                                                                                                                                                                                                                                                 |
|---------------------------------------------------------------------|-----|--------------------------------------------------------------------------------------------------------------------------------------------------------------------------------------------------------------------------------------------------------------------------------------------------------------------------------------------------------------------------------|-------------------------------------------------------------------------------------------------------------------------------------------------------------------------------------------------------------------------------------------------------------------------------------------------------------------------------------------------|
| Outcomes                                                            | 12  | Primary, secondary, and other outcomes, including the specific measurement variable (eg, systolic blood pressure), analysis metric (eg, change from baseline, final value, time to event), method of aggregation (eg, median, proportion), and time point for each outcome. Explanation of the clinical relevance of chosen efficacy and harm outcomes is strongly recommended | Primary and secondary outcomes for the forthcoming fully powered RCT are described (p. 5). The objectives for the present pilot RCT are described (p. 9-10), and the analyses of data (p. 14-15), time point for collecting outcome measures (p. 13-14), and explanations for clinical relevance of the DiaPROM trial (p. 4-5 and 16), as well. |
| Participant timeline                                                | 13  | Time schedule of enrolment, interventions (including any run-ins and washouts), assessments, and visits for participants. A schematic diagram is highly recommended (see Figure)                                                                                                                                                                                               | Described in the methods section (starts on p. 10). A figure describing the steps in the intervention is also included.                                                                                                                                                                                                                         |
| Sample size                                                         | 14  | Estimated number of participants needed to achieve study objectives and how it was determined, including clinical and statistical assumptions supporting any sample size calculations                                                                                                                                                                                          | The rationale for number of participants is described in the methods section (p. 10).                                                                                                                                                                                                                                                           |
| Recruitment                                                         | 15  | Strategies for achieving adequate participant enrolment to reach target sample size                                                                                                                                                                                                                                                                                            | Not relevant for a pilot study                                                                                                                                                                                                                                                                                                                  |
| <b>Methods: Assignment of interventions (for controlled trials)</b> |     |                                                                                                                                                                                                                                                                                                                                                                                |                                                                                                                                                                                                                                                                                                                                                 |
| Allocation:                                                         |     |                                                                                                                                                                                                                                                                                                                                                                                |                                                                                                                                                                                                                                                                                                                                                 |
| Sequence generation                                                 | 16a | Method of generating the allocation sequence (eg, computer-generated random numbers), and list of any factors for stratification. To reduce predictability of a random sequence, details of any planned restriction (eg, blocking) should be provided in a separate document that is unavailable to those who enrol participants or assign interventions                       | Included in the methods section (p. 11).                                                                                                                                                                                                                                                                                                        |
| Allocation concealment mechanism                                    | 16b | Mechanism of implementing the allocation sequence (eg, central telephone; sequentially numbered, opaque, sealed envelopes), describing any steps to conceal the sequence until interventions are assigned                                                                                                                                                                      | Described in the methods section (p. 11)                                                                                                                                                                                                                                                                                                        |
| Implementation                                                      | 16c | Who will generate the allocation sequence, who will enrol participants, and who will assign participants to interventions                                                                                                                                                                                                                                                      | Described in the methods section (p. 11)                                                                                                                                                                                                                                                                                                        |
| Blinding (masking)                                                  | 17a | Who will be blinded after assignment to interventions (eg, trial participants, care providers, outcome assessors, data analysts), and how                                                                                                                                                                                                                                      | Described in the methods section (p. 11).                                                                                                                                                                                                                                                                                                       |



|                                                           |     |                                                                                                                                                                                                                                                                                                                                                                                                              |                                                                                                                                                                      |
|-----------------------------------------------------------|-----|--------------------------------------------------------------------------------------------------------------------------------------------------------------------------------------------------------------------------------------------------------------------------------------------------------------------------------------------------------------------------------------------------------------|----------------------------------------------------------------------------------------------------------------------------------------------------------------------|
|                                                           | 17b | If blinded, circumstances under which unblinding is permissible, and procedure for revealing a participant's allocated intervention during the trial                                                                                                                                                                                                                                                         | The study is not blinded for the participants and the health care providers as stated (p. 11).                                                                       |
| <b>Methods: Data collection, management, and analysis</b> |     |                                                                                                                                                                                                                                                                                                                                                                                                              |                                                                                                                                                                      |
| Data collection methods                                   | 18a | Plans for assessment and collection of outcome, baseline, and other trial data, including any related processes to promote data quality (eg, duplicate measurements, training of assessors) and a description of study instruments (eg, questionnaires, laboratory tests) along with their reliability and validity, if known. Reference to where data collection forms can be found, if not in the protocol | Plans for assessments and included measures are described in the methods section (p. 13-14). References to the included instruments are given.                       |
|                                                           | 18b | Plans to promote participant retention and complete follow-up, including list of any outcome data to be collected for participants who discontinue or deviate from intervention protocols                                                                                                                                                                                                                    | The relevant information for a pilot RCT is described in the methods section (p. 10-14)                                                                              |
| Data management                                           | 19  | Plans for data entry, coding, security, and storage, including any related processes to promote data quality (eg, double data entry; range checks for data values). Reference to where details of data management procedures can be found, if not in the protocol                                                                                                                                            | Data storage is described (p. 15). Data entry is described (p. 14). Reference to where details of data management procedures can be found is described (p. 2 and 15) |
| Statistical methods                                       | 20a | Statistical methods for analysing primary and secondary outcomes. Reference to where other details of the statistical analysis plan can be found, if not in the protocol                                                                                                                                                                                                                                     | Statistical analysis plans for both quantitative and qualitative data are included (p. 14-15)                                                                        |
|                                                           | 20b | Methods for any additional analyses (eg, subgroup and adjusted analyses)                                                                                                                                                                                                                                                                                                                                     | N/A for a pilot study.                                                                                                                                               |
|                                                           | 20c | Definition of analysis population relating to protocol non-adherence (eg, as randomised analysis), and any statistical methods to handle missing data (eg, multiple imputation)                                                                                                                                                                                                                              | N/A for a pilot study.                                                                                                                                               |
| <b>Methods: Monitoring</b>                                |     |                                                                                                                                                                                                                                                                                                                                                                                                              |                                                                                                                                                                      |

|                                 |     |                                                                                                                                                                                                                                                                                                                                       |                                                               |
|---------------------------------|-----|---------------------------------------------------------------------------------------------------------------------------------------------------------------------------------------------------------------------------------------------------------------------------------------------------------------------------------------|---------------------------------------------------------------|
| Data monitoring                 | 21a | Composition of data monitoring committee (DMC); summary of its role and reporting structure; statement of whether it is independent from the sponsor and competing interests; and reference to where further details about its charter can be found, if not in the protocol. Alternatively, an explanation of why a DMC is not needed | None planned.                                                 |
|                                 | 21b | Description of any interim analyses and stopping guidelines, including who will have access to these interim results and make the final decision to terminate the trial                                                                                                                                                               | None planned.                                                 |
| Harms                           | 22  | Plans for collecting, assessing, reporting, and managing solicited and spontaneously reported adverse events and other unintended effects of trial interventions or trial conduct                                                                                                                                                     | Included in the ethics and dissemination section (p. 15-16).  |
| Auditing                        | 23  | Frequency and procedures for auditing trial conduct, if any, and whether the process will be independent from investigators and the sponsor                                                                                                                                                                                           | Not planned.                                                  |
| <b>Ethics and dissemination</b> |     |                                                                                                                                                                                                                                                                                                                                       |                                                               |
| Research ethics approval        | 24  | Plans for seeking research ethics committee/institutional review board (REC/IRB) approval                                                                                                                                                                                                                                             | Included (p.2 and 16).                                        |
| Protocol amendments             | 25  | Plans for communicating important protocol modifications (eg, changes to eligibility criteria, outcomes, analyses) to relevant parties (eg, investigators, REC/IRBs, trial participants, trial registries, journals, regulators)                                                                                                      | Described in the ethics and dissemination section (p. 15-16). |
| Consent or assent               | 26a | Who will obtain informed consent or assent from potential trial participants or authorised surrogates, and how (see Item 32)                                                                                                                                                                                                          | Described in the method section (starts on p. 10)             |
|                                 | 26b | Additional consent provisions for collection and use of participant data and biological specimens in ancillary studies, if applicable                                                                                                                                                                                                 | N/A                                                           |
| Confidentiality                 | 27  | How personal information about potential and enrolled participants will be collected, shared, and maintained in order to protect confidentiality before, during, and after the trial                                                                                                                                                  | Described in the ethics and dissemination section (p. 15-16). |

|                                  |                               |     |                                                                                                                                                                                                                                                                                     |                                                               |
|----------------------------------|-------------------------------|-----|-------------------------------------------------------------------------------------------------------------------------------------------------------------------------------------------------------------------------------------------------------------------------------------|---------------------------------------------------------------|
| 1<br>2<br>3<br>4                 | Declaration of interests      | 28  | Financial and other competing interests for principal investigators for the overall trial and each study site                                                                                                                                                                       | Included (p. 18)                                              |
| 5<br>6<br>7                      | Access to data                | 29  | Statement of who will have access to the final trial dataset, and disclosure of contractual agreements that limit such access for investigators                                                                                                                                     | Described in the ethics and dissemination section (p. 15-16). |
| 8<br>9<br>10                     | Ancillary and post-trial care | 30  | Provisions, if any, for ancillary and post-trial care, and for compensation to those who suffer harm from trial participation                                                                                                                                                       | N/A                                                           |
| 11<br>12<br>13<br>14<br>15<br>16 | Dissemination policy          | 31a | Plans for investigators and sponsor to communicate trial results to participants, healthcare professionals, the public, and other relevant groups (eg, via publication, reporting in results databases, or other data sharing arrangements), including any publication restrictions | Described in the ethics and dissemination section (p. 15-16). |
| 17<br>18<br>19                   |                               | 31b | Authorship eligibility guidelines and any intended use of professional writers                                                                                                                                                                                                      | N/A                                                           |
| 20<br>21<br>22                   |                               | 31c | Plans, if any, for granting public access to the full protocol, participant-level dataset, and statistical code                                                                                                                                                                     | N/A                                                           |
| 23<br>24                         | <b>Appendices</b>             |     |                                                                                                                                                                                                                                                                                     |                                                               |
| 25<br>26<br>27                   | Informed consent materials    | 32  | Model consent form and other related documentation given to participants and authorised surrogates                                                                                                                                                                                  | Not available in English.                                     |
| 28<br>29<br>30<br>31<br>32       | Biological specimens          | 33  | Plans for collection, laboratory evaluation, and storage of biological specimens for genetic or molecular analysis in the current trial and for future use in ancillary studies, if applicable                                                                                      | N/A                                                           |

33 \*It is strongly recommended that this checklist be read in conjunction with the SPIRIT 2013 Explanation & Elaboration for important clarification on the items. Amendments to the  
 34 protocol should be tracked and dated. The SPIRIT checklist is copyrighted by the SPIRIT Group under the Creative Commons "[Attribution-NonCommercial-NoDerivs 3.0 Unported](https://creativecommons.org/licenses/by-nc-nd/3.0/)"  
 35 license.  
 36  
 37  
 38  
 39  
 40  
 41  
 42
